# Supplementary material for: On the link between precipitation and the ice water path over tropical and mid-latitude regimes as derived from satellite observations
Source: Copernicus journal article supplement (doi:10.5194/amt-2017-121), 2017-05-03
Supplement: Supplementary file 1 [file amt_2017_YT_supporting.xlsx]

## Sheet: alpha
49.5	NaN	NaN	NaN	NaN	NaN	NaN	NaN	NaN	NaN	NaN	NaN	NaN	NaN	NaN	NaN	NaN	NaN	NaN	NaN	NaN	NaN	NaN	NaN	NaN	NaN	NaN	NaN	NaN	NaN	NaN	NaN	NaN	NaN	NaN	NaN	NaN	NaN	NaN	NaN	NaN	NaN	NaN	NaN	NaN	NaN	NaN	NaN	NaN	NaN
48.5	NaN	NaN	NaN	NaN	NaN	NaN	NaN	NaN	NaN	NaN	NaN	NaN	NaN	NaN	NaN	NaN	NaN	NaN	NaN	NaN	NaN	NaN	NaN	NaN	NaN	NaN	NaN	NaN	NaN	NaN	NaN	NaN	NaN	NaN	NaN	NaN	NaN	NaN	NaN	NaN	NaN	NaN	NaN	NaN	NaN	NaN	NaN	NaN	NaN
47.5	NaN	NaN	0.000627297	0.000682162	0.000710705	0.000809322	0.000892121	0.000690469	0.000567707	0.000432768	0.000315033	0.000270559	0.00023007	0.000200677	0.000190697	0.00014091	0.000104305	7.68718e-05	6.02342e-05	4.66186e-05	4.08422e-05	3.49056e-05	4.36941e-05	7.07091e-05	0.000100128	0.00011609	0.000160939	0.000156206	0.000134483	0.000177486	0.000200576	0.000203762	0.000182049	0.00018828	0.000199919	0.000199043	0.000521368	0.000401456	0.000477471	0.000556619	0.00078665	0.000535288	0.000526982	0.000750009	0.00101084	0.00076373	0.000777648	0.000528551	0.000472654
46.5	NaN	NaN	0.00048981	0.000471934	0.000581823	0.000830022	0.000886129	0.000752874	0.000522215	0.000512656	0.000464391	0.000407631	0.000201563	0.000275445	0.000251337	0.000134573	8.81331e-05	6.42117e-05	4.15739e-05	3.6033e-05	3.93779e-05	2.96112e-05	3.95839e-05	8.3331e-05	0.000117382	0.000143091	0.000167173	0.000150562	0.000116613	0.000173408	0.00018719	0.000185245	0.000212566	0.000223034	0.00023259	0.000201288	0.000317735	0.000435209	0.000355915	0.000510357	0.00101527	0.000798976	0.00110074	0.0015515	0.00130773	0.00101579	0.000719802	0.000421499	0.000422593
45.5	NaN	NaN	0.000392298	0.000323232	0.00032589	0.000427669	0.000581781	0.000762413	0.000608395	0.000686588	0.000531001	0.000478391	0.000334141	0.000315408	0.000298657	0.000189055	0.000119252	8.68986e-05	5.56876e-05	5.49922e-05	4.7142e-05	5.41517e-05	6.981e-05	9.06315e-05	0.000114495	0.000162998	0.000145806	0.000109171	0.000103661	0.000171119	0.000247556	0.000264984	0.000336996	0.000395613	0.000310435	0.000226065	0.000297279	0.000288366	0.000268663	0.000386264	0.000720447	0.00110859	0.00151157	0.00152281	0.00124702	0.000866031	0.000792438	0.00038516	0.00037856
44.5	NaN	NaN	0.000401029	0.000417531	0.000457971	0.000524137	0.000706725	0.000669133	0.000593211	0.000521696	0.000453189	0.000305456	0.000257515	0.000232531	0.000277004	0.000246614	0.000190899	0.000145415	0.000109911	9.32422e-05	6.17115e-05	6.74383e-05	6.96637e-05	8.37544e-05	9.9626e-05	0.000151568	0.000111363	0.000101545	8.12832e-05	0.000130548	0.000190546	0.000188909	0.000214914	0.000229051	0.000203553	0.000148164	0.000157848	0.000189934	0.00024696	0.000454084	0.000863303	0.00108482	0.00170618	0.00171887	0.00100198	0.000670313	0.000417281	0.000382185	0.000424053
43.5	NaN	NaN	0.000400564	0.000409328	0.000389656	0.0005478	0.000684613	0.000658919	0.000620507	0.000499526	0.000373916	0.00024347	0.000199416	0.000212509	0.00031279	0.00030376	0.000214038	0.000199431	0.000168258	0.000115385	7.03566e-05	6.02917e-05	5.74743e-05	6.14848e-05	7.21898e-05	9.8319e-05	9.18777e-05	9.03479e-05	8.44887e-05	0.000123574	0.000179995	0.000154238	0.00019062	0.000233366	0.000185153	0.000129026	0.000132912	0.000168081	0.000221062	0.000310087	0.000603748	0.0014677	0.00142748	0.00128657	0.00077142	0.000424171	0.000298606	0.000290393	0.000287158
42.5	NaN	NaN	0.000504431	0.0005042	0.000544878	0.00040492	0.000462023	0.000443809	0.000415666	0.000405081	0.000377183	0.000337134	0.000313145	0.000259465	0.000302205	0.000272759	0.000247827	0.000191371	0.000191647	0.000114854	7.41314e-05	7.70579e-05	7.54734e-05	7.45969e-05	9.97076e-05	0.000120727	0.000100584	0.000133894	0.000134364	0.000176158	0.000215165	0.000174639	0.000146077	0.000224649	0.000192224	0.000170904	0.000142306	0.000154737	0.000146659	0.000243858	0.000635867	0.0010249	0.00147286	0.000829605	0.000690719	0.000435028	0.000113119	0.000158906	0.000374132
41.5	NaN	NaN	0.000800049	0.000609771	0.000591062	0.000481316	0.000457285	0.000584698	0.000491394	0.000383786	0.00053895	0.000521103	0.000387636	0.000280699	0.000338055	0.000256603	0.000270099	0.000263008	0.000195127	0.000121428	7.29322e-05	7.02948e-05	7.87148e-05	8.09861e-05	0.000121298	0.000164923	0.000136786	0.000163705	0.000158308	0.000186795	0.000227231	0.000249343	0.000155497	0.000171497	0.000186074	0.00014469	0.000123047	0.00012201	0.000122789	0.000200648	0.000394267	0.000733013	0.000592684	NaN	NaN	NaN	6.51651e-05	0.000388213	0.000205704
40.5	NaN	NaN	0.00101122	0.000736566	0.00110835	0.000561269	0.000521169	0.000611593	0.000479315	0.000408014	0.000623303	0.000623669	0.000458854	0.000480559	0.0005477	0.000377265	0.000445507	0.000381674	0.000314822	0.000158179	9.62333e-05	0.00011546	0.000104046	0.000129996	0.000158317	0.000193364	0.000130794	0.000158983	0.000151257	0.0001294	0.000202653	0.000208457	0.000187079	0.00021545	0.000225374	0.000158347	0.000128895	0.000126731	0.000106684	0.000219095	0.000239871	0.00020124	NaN	NaN	NaN	NaN	NaN	0.000134343	0.000109165
39.5	NaN	NaN	0.000676799	0.000617743	0.000791947	0.000523386	0.000532065	0.00061882	0.000430782	0.000359611	0.000612053	0.000528467	0.000505186	0.000533963	0.000398295	0.000317676	0.000262792	0.0002824	0.000245723	0.000142081	0.0001072	0.000119802	8.25826e-05	9.68226e-05	0.000145546	0.000150076	0.00014719	0.000181204	0.000164414	0.000159609	0.000210045	0.000246542	0.000171571	0.0002154	0.000254234	0.000240595	0.000164959	0.000205754	0.00015356	0.000168714	0.000217627	NaN	NaN	NaN	NaN	NaN	NaN	NaN	NaN
38.5	NaN	NaN	0.000425349	0.00047175	0.000577049	0.000432363	0.000427973	0.000494592	0.000472819	0.000491837	0.000524289	0.000481616	0.00042988	0.000393033	0.000329952	0.000250732	0.000252644	0.000221421	0.000221095	0.00013067	9.91913e-05	0.000117996	0.000104662	0.00011313	0.000182308	0.000196068	0.000240572	0.000234293	0.000216509	0.000185224	0.000246625	0.000366256	0.000265572	0.000389439	0.00039058	0.000335116	0.000207548	NaN	NaN	NaN	NaN	NaN	NaN	NaN	NaN	NaN	NaN	NaN	NaN
37.5	NaN	NaN	0.000284451	0.000269913	0.000335846	0.000231556	0.000360087	0.000438215	0.000511435	0.000588458	0.000709687	0.000364244	0.000273718	0.000265393	0.000244873	0.000202654	0.000208436	0.000146798	0.000177737	0.000120562	0.00011828	0.000156706	0.000143881	0.000147377	0.000224183	0.000211287	0.000209999	0.000287275	0.000247528	0.000263254	0.00029263	0.000219877	0.000250868	0.000309504	0.000442174	NaN	NaN	NaN	NaN	NaN	NaN	NaN	NaN	NaN	NaN	NaN	NaN	NaN	NaN
36.5	NaN	NaN	0.000275336	0.000293673	0.000257228	0.00021615	0.000267671	0.000346456	0.000470066	0.000533759	0.000572469	0.000396377	0.000342844	0.000295678	0.000305709	0.000244778	0.000241094	0.000182971	0.000181716	0.000174466	0.000178829	0.00019339	0.000102321	6.49101e-05	0.000163922	0.000159078	0.000365383	0.000432654	0.000413944	0.0003629	0.00046618	0.000211998	0.000165955	NaN	NaN	NaN	NaN	NaN	NaN	NaN	NaN	NaN	NaN	NaN	NaN	NaN	NaN	NaN	NaN
35.5	NaN	NaN	0.00022117	0.000190657	0.000179675	0.000162743	0.000240485	0.000336517	0.000362601	0.000518832	0.000531373	0.000452024	0.000464564	0.000449836	0.000305109	0.000219204	0.000201321	0.000135576	0.000147845	0.00012757	0.000139848	6.54923e-05	9.5702e-05	8.89975e-05	0.000134697	0.000213946	0.000175149	0.00034617	0.00037244	0.000292273	0.000273247	0.000394744	0.000120941	NaN	NaN	NaN	NaN	NaN	NaN	NaN	NaN	NaN	NaN	NaN	NaN	NaN	NaN	NaN	NaN
34.5	NaN	NaN	0.000250437	0.000219526	0.000179721	0.000205276	0.000282805	0.000323028	0.000400571	0.000510325	0.000617073	0.000549036	0.000693905	0.000497794	0.000440269	0.000226146	0.000212845	0.000164293	0.000137496	0.000153478	5.67492e-05	5.31856e-05	7.69218e-05	9.24001e-05	0.00010047	0.000164027	0.000146659	0.00028383	0.00026965	0.000239667	0.000253615	0.000543578	NaN	NaN	NaN	NaN	NaN	NaN	NaN	NaN	NaN	NaN	NaN	NaN	NaN	NaN	NaN	NaN	NaN
33.5	NaN	NaN	0.000391978	0.000385144	0.000351192	0.000345539	0.000483001	0.000510966	0.000520683	0.000568716	0.000518529	0.000524199	0.00062512	0.000579734	0.000457143	0.000388698	0.000308368	0.000274188	0.000171801	8.77089e-05	7.99902e-05	0.000138446	0.000174674	0.000215197	0.000224706	0.00042689	0.000293459	0.000293778	0.000246408	8.93854e-05	0.000154678	0.000208298	NaN	NaN	NaN	NaN	NaN	NaN	NaN	NaN	NaN	NaN	NaN	NaN	NaN	NaN	NaN	NaN	NaN
32.5	NaN	NaN	0.000489666	0.000555026	0.000513614	0.00069511	0.000716483	0.000621411	0.000574677	0.000552766	0.000453378	0.000394117	0.000740607	0.000692125	0.00094196	0.000632025	0.000571195	0.000346935	0.000203286	0.000181093	0.000145653	0.000152131	0.000182136	0.000323708	0.000297588	0.000393296	0.000293867	0.000237331	9.47688e-05	0.000138108	7.00067e-05	NaN	NaN	NaN	NaN	NaN	NaN	NaN	NaN	NaN	NaN	NaN	NaN	NaN	NaN	NaN	NaN	NaN	NaN
31.5	NaN	NaN	0.000642121	0.000584395	0.000616971	0.000909658	0.000856922	0.000781906	0.000753168	0.000687463	0.000532431	0.000561317	0.000675862	0.000799765	0.00103832	0.000782556	0.000789582	0.000487594	0.000555345	0.000386026	0.000341298	0.000292613	0.000339835	0.000372735	0.000289376	0.000446645	0.000316391	0.000243828	0.000151559	0.000190562	NaN	NaN	NaN	NaN	NaN	NaN	NaN	NaN	NaN	NaN	NaN	NaN	NaN	NaN	NaN	NaN	NaN	NaN	NaN
30.5	NaN	NaN	0.000967148	0.000942392	0.00111349	0.00160805	0.00130272	0.00107808	0.000999177	0.000862687	0.000879331	0.000741263	0.000945809	0.000915425	0.00117057	0.00104632	0.0010689	0.000859252	0.000768792	0.00074484	0.000582739	0.000502476	0.000418146	0.000471323	0.000549452	0.000645783	0.00049375	0.000536295	0.000267345	0.000148369	NaN	NaN	NaN	NaN	NaN	NaN	NaN	NaN	NaN	NaN	NaN	NaN	NaN	NaN	NaN	NaN	NaN	NaN	NaN
29.5	NaN	NaN	0.00127366	0.00145722	0.00146251	0.00220052	0.00167643	0.00141261	0.00121288	0.00121802	0.000706046	0.000848588	0.000947484	0.000913245	0.00107651	0.0011882	0.00128937	0.000907256	0.00108971	0.000814946	0.000952076	0.000941059	0.000427687	0.000470238	0.000771647	0.000899295	0.000776302	0.00106315	0.000476384	0.000206331	NaN	NaN	NaN	NaN	NaN	NaN	NaN	NaN	NaN	NaN	NaN	NaN	NaN	NaN	NaN	NaN	NaN	NaN	NaN
28.5	NaN	NaN	0.00145126	0.00128591	0.0014158	0.00189937	0.00200555	0.00158988	0.00147757	0.00150266	0.00101267	0.00106281	0.0011956	0.00140458	0.0016727	0.00180398	0.00147701	0.0011254	0.00128392	0.000908656	0.000540437	0.0010284	0.000239128	0.000328984	0.0005671	0.000887062	0.00161851	0.0019768	0.00221309	NaN	NaN	NaN	NaN	NaN	NaN	NaN	NaN	NaN	NaN	NaN	NaN	NaN	NaN	NaN	NaN	NaN	NaN	NaN	NaN
27.5	NaN	NaN	0.00145511	0.00134081	0.00158198	0.00187108	0.0016011	0.00158317	0.00165776	0.0018503	0.00147061	0.00167581	0.00170144	0.00183514	0.00208667	0.00232314	0.00204815	0.00149816	0.00110929	0.000982578	0.000443812	0.000759794	0.00145393	0.00158838	0.000851408	0.000848836	0.00176278	0.00172188	0.00185848	NaN	NaN	NaN	NaN	NaN	NaN	NaN	NaN	NaN	NaN	NaN	NaN	NaN	NaN	NaN	NaN	NaN	NaN	NaN	NaN
26.5	NaN	NaN	0.00148913	0.00147162	0.00173994	0.00194976	0.00143529	0.00169385	0.00163846	0.0016672	0.00149385	0.00170366	0.00225203	0.00264397	0.00228734	0.00306215	0.00274526	0.0017059	0.00134177	0.000934719	0.000565984	0.000697396	0.00138793	0.00233069	0.00268832	0.00329799	0.00193068	0.00862862	NaN	NaN	NaN	NaN	NaN	NaN	NaN	NaN	NaN	NaN	NaN	NaN	NaN	NaN	NaN	NaN	NaN	NaN	NaN	NaN	NaN
25.5	NaN	NaN	0.00136998	0.00131895	0.00161409	0.00171318	0.00154989	0.00166454	0.00187022	0.00180445	0.0016432	0.00209073	0.00279936	0.00230902	0.00243724	0.00238108	0.00149717	0.00147975	0.00124735	0.000667862	0.000629058	0.000670779	0.00112115	0.00187857	0.00318068	0.00295657	0.00404942	0.00387932	NaN	NaN	NaN	NaN	NaN	NaN	NaN	NaN	NaN	NaN	NaN	NaN	NaN	NaN	NaN	NaN	NaN	NaN	NaN	NaN	NaN
24.5	NaN	NaN	0.0015369	0.00145043	0.001625	0.00145283	0.00161458	0.00155355	0.00201442	0.00167716	0.00217082	0.00287272	0.00259961	0.00381273	0.00289436	0.00249336	0.00172309	0.00110436	0.00130245	0.000628626	0.000443144	0.000561348	0.000788713	0.0012688	0.00234772	0.0019825	0.00297235	NaN	NaN	NaN	NaN	NaN	NaN	NaN	NaN	NaN	NaN	NaN	NaN	NaN	NaN	NaN	NaN	NaN	NaN	NaN	NaN	NaN	NaN
23.5	NaN	NaN	0.00169421	0.00190542	0.0023554	0.00181852	0.00195929	0.00204189	0.00205248	0.00238405	0.00278551	0.00357415	0.00397894	0.00444458	0.00347334	0.00428978	0.00251603	0.00156865	0.000773854	0.000639705	0.00107027	0.000384803	0.000716826	0.00107285	0.0021151	0.00276892	NaN	NaN	NaN	NaN	NaN	NaN	NaN	NaN	NaN	NaN	NaN	NaN	NaN	NaN	NaN	NaN	NaN	NaN	NaN	NaN	NaN	NaN	NaN
22.5	NaN	NaN	0.00229977	0.00198864	0.00222278	0.00206628	0.00226821	0.00265408	0.00241747	0.00350864	0.00373709	0.00406386	0.00327461	0.00341676	0.00442453	0.00341314	0.00309803	0.00384425	0.00220642	0.00113648	0.00192686	NaN	NaN	NaN	NaN	NaN	NaN	NaN	NaN	NaN	NaN	NaN	NaN	NaN	NaN	NaN	NaN	NaN	NaN	NaN	NaN	NaN	NaN	NaN	NaN	NaN	NaN	NaN	NaN
21.5	NaN	NaN	0.0022498	0.00239055	0.00257543	0.00225293	0.00222859	0.00232993	0.00309374	0.00343777	0.00472018	0.00358607	0.00350546	0.0032146	0.00307927	0.00309115	0.0026755	0.00570983	0.00105618	0.00122951	NaN	NaN	NaN	NaN	NaN	NaN	NaN	NaN	NaN	NaN	NaN	NaN	NaN	NaN	NaN	NaN	NaN	NaN	NaN	NaN	NaN	NaN	NaN	NaN	NaN	NaN	NaN	NaN	NaN
20.5	NaN	NaN	0.00250297	0.00237056	0.00245374	0.0024467	0.00302463	0.00288866	0.00250969	0.00450874	0.00432011	0.00431319	0.00342624	0.00421719	0.00403692	0.00284673	0.00280384	0.00224386	0.00161179	0.000746657	NaN	NaN	NaN	NaN	NaN	NaN	NaN	NaN	NaN	NaN	NaN	NaN	NaN	NaN	NaN	NaN	NaN	NaN	NaN	NaN	NaN	NaN	NaN	NaN	NaN	NaN	NaN	NaN	NaN
19.5	NaN	NaN	0.0029538	0.0027159	0.00268714	0.00252893	0.0031821	0.00433325	0.00394645	0.00394381	0.00465284	0.0036733	0.00284455	0.00432263	0.00338203	0.00174175	0.00161579	0.00181112	NaN	NaN	NaN	NaN	NaN	NaN	NaN	NaN	NaN	NaN	NaN	NaN	NaN	NaN	NaN	NaN	NaN	NaN	NaN	NaN	NaN	NaN	NaN	NaN	NaN	NaN	NaN	NaN	NaN	NaN	NaN
18.5	NaN	NaN	0.00259981	0.00234749	0.00251037	0.00242324	0.00296435	0.00347431	0.00328668	0.00418404	0.00329051	0.00376211	0.00442085	0.00252175	0.00180666	0.000899232	0.000961723	NaN	NaN	NaN	NaN	NaN	NaN	NaN	NaN	NaN	NaN	NaN	NaN	NaN	NaN	NaN	NaN	NaN	NaN	NaN	NaN	NaN	NaN	NaN	NaN	NaN	NaN	NaN	NaN	NaN	NaN	NaN	NaN
17.5	NaN	NaN	0.00213283	0.0023972	0.00210601	0.00242913	0.00251795	0.00353134	0.00346422	0.00341744	0.00273154	0.00295589	0.00243183	0.00198536	0.00150724	0.000697175	NaN	NaN	NaN	NaN	NaN	NaN	NaN	NaN	NaN	NaN	NaN	NaN	NaN	NaN	NaN	NaN	NaN	NaN	NaN	NaN	NaN	NaN	NaN	NaN	NaN	NaN	NaN	NaN	NaN	NaN	NaN	NaN	NaN
16.5	NaN	NaN	0.00190856	0.0025914	0.00198118	0.00172627	0.00228429	0.00282054	0.00310023	0.00280197	0.00281716	0.00185382	0.00205675	0.00172923	0.00158634	0.000734486	NaN	NaN	NaN	NaN	NaN	NaN	NaN	NaN	NaN	NaN	NaN	NaN	NaN	NaN	NaN	NaN	NaN	NaN	NaN	NaN	NaN	NaN	NaN	NaN	NaN	NaN	NaN	NaN	NaN	NaN	NaN	NaN	NaN
15.5	NaN	NaN	0.0017197	0.00194258	0.00141973	0.00145815	0.00108678	0.00137162	0.00206114	0.00183394	0.00178465	0.00113177	0.00127033	0.00105327	0.00116652	0.000505708	NaN	NaN	NaN	NaN	NaN	NaN	NaN	NaN	NaN	NaN	NaN	NaN	NaN	NaN	NaN	NaN	0.000271038	0.000293638	0.000185069	0.000144293	0.000137961	0.000101716	5.31534e-05	5.47835e-05	NaN	NaN	NaN	0.000319012	0.000300871	0.000562475	0.000737655	0.000460689	0.00042951
14.5	NaN	NaN	0.00118047	0.00161327	0.00126907	0.00128019	0.00106918	0.00170456	0.000910561	0.00105997	0.000891609	0.000827408	0.00100862	0.00141519	0.00118505	0.00126475	0.00159399	0.000914445	0.000849956	0.00100514	0.000747314	0.000561381	0.00101382	0.000739876	0.000779474	0.000976133	0.00109409	0.000275889	0.000236451	0.000429165	0.000295077	0.000365557	0.000403152	0.000424391	0.000243496	0.000189722	0.000130507	0.000106232	0.000123288	0.000149482	0.000163756	0.00021443	0.000598658	0.000653183	0.00046757	0.000539981	0.000711707	0.000761758	0.000664752
13.5	NaN	NaN	0.00113573	0.00135669	0.00125855	0.00145839	0.0012359	0.00111659	0.000893633	0.000948319	0.000960517	0.000901011	0.00108106	0.00126537	0.00106375	0.000995332	0.000904558	0.000579691	0.000366562	0.00029464	0.000301361	0.00031893	0.000429601	0.000733686	0.000738631	0.000804553	0.000544481	0.000507248	0.000408995	0.000381054	0.000328966	0.00033097	0.000344302	0.000257592	0.000265602	0.000263791	0.000270155	0.000237673	0.000347893	0.000306613	0.000295605	0.00027831	0.000384392	0.00042268	0.000414842	0.000414386	0.000524848	0.000669452	0.000698139
12.5	NaN	NaN	0.00114951	0.00123905	0.00148771	0.00146512	0.00184609	0.00183173	0.00118364	0.00121753	0.00112272	0.00114303	0.0012182	0.00146703	0.00128807	0.00096424	0.000921995	0.000692689	0.000554147	0.000598556	0.000696812	0.00104376	0.00116058	0.00141796	0.00179761	0.00138396	0.000769241	0.000739844	0.000534285	0.000530312	0.000527475	0.000644228	0.000657093	0.000591231	0.000577165	0.000551548	0.000673391	0.000673105	0.000547555	0.00054336	0.000542093	0.00053801	0.000659375	0.000705718	0.000700081	0.000773653	0.000934494	0.00101543	0.00129066
11.5	NaN	NaN	0.00145721	0.0016251	0.00186927	0.00228238	0.00246527	0.00180357	0.00122442	0.00114222	0.00119028	0.00139473	0.00188452	0.00223046	0.0021667	0.00165872	0.00138675	0.00129894	0.000970607	0.00105001	0.00104205	0.0012532	0.00124431	0.00134529	0.00145232	0.00134836	0.00108244	0.000867822	0.000771544	0.000657883	0.000667378	0.000718385	0.000849922	0.000860924	0.000885248	0.000676785	0.000878531	0.000873815	0.000851531	0.000819599	0.000876911	0.000869622	0.00100568	0.00104436	0.00100005	0.00124289	0.00143881	0.00127522	0.00166098
10.5	NaN	NaN	0.00157095	0.0016279	0.00211876	0.00231538	0.00230609	0.00194193	0.00159056	0.00138901	0.00135592	0.00156982	0.00201633	0.00232263	0.00270134	0.00215808	0.00202997	0.00179104	0.00165585	0.00142224	0.00135978	0.00151468	0.0015514	0.00166919	0.00220398	0.00197831	0.00154257	0.00158984	0.00150507	0.00142135	0.00135917	0.00139981	0.0012201	0.00121196	0.00119525	0.00111796	0.00126037	0.00132844	0.00142197	0.00132237	0.00137514	0.00142792	0.00178183	0.0016952	0.00169449	0.00190713	0.00188119	0.00156064	0.00179022
9.5	NaN	NaN	0.00179707	0.00199898	0.00224287	0.0025783	0.00255934	0.00238466	0.00185469	0.00172534	0.00155758	0.00176972	0.00205433	0.00258016	0.00240635	0.00229753	0.00222562	0.00208847	0.00189222	0.00183964	0.00198771	0.00256687	0.00239163	0.00250171	0.00268741	0.0026173	0.00199068	0.00200428	0.00210295	0.00195208	0.00200962	0.00191573	0.00173794	0.00165327	0.00152258	0.00121731	0.00162235	0.00164515	0.0017906	0.00178777	0.00176215	0.00191276	0.00234779	0.0021205	0.00182822	0.00217531	0.00210965	0.00178803	0.00203737
8.5	NaN	NaN	0.00176731	0.0021251	0.00254201	0.00277547	0.0029346	0.00279583	0.00244009	0.00225596	0.00194325	0.00202823	0.00229811	0.002342	0.00258606	0.00264772	0.0028756	0.00264489	0.00256157	0.00236226	0.00228752	0.00263396	0.00235674	0.00265816	0.00356545	0.00336481	0.00272668	0.0026928	0.00300231	0.00300951	0.00284954	0.00253437	0.0025812	0.00221071	0.00198344	0.00174922	0.00220261	0.00193812	0.00224835	0.00246079	0.00246498	0.00234295	0.0028154	0.00220783	0.00201044	0.0021954	0.00229112	0.00195358	0.00216455
7.5	NaN	NaN	0.00182769	0.00231199	0.00267478	0.00287432	0.00300875	0.00299505	0.00242135	0.00236681	0.00212421	0.00209827	0.00236279	0.00243095	0.00266174	0.00285362	0.00309331	0.00301308	0.00259418	0.00244143	0.00248161	0.00262865	0.00277754	0.00299647	0.00349622	0.00351066	0.00315588	0.00336298	0.00338089	0.00342957	0.00351356	0.00304457	0.00276387	0.00222044	0.00205407	0.00188273	0.00232372	0.00217402	0.00267078	0.00279548	0.00289064	0.00283002	0.00304306	0.00243829	0.00220336	0.00218983	0.00205007	0.0016954	0.00180563
6.5	NaN	NaN	0.00218824	0.00304461	0.00333239	0.00318091	0.0034119	0.00338097	0.00278509	0.00280051	0.00273526	0.00263155	0.00280351	0.00269917	0.002658	0.00307669	0.00308036	0.00286233	0.00266369	0.00242608	0.0023312	0.00264559	0.00264026	0.00304192	0.00342018	0.00390461	0.00380853	0.00394624	0.00395493	0.00413778	0.00370858	0.00347581	0.00285771	0.00236437	0.00209379	0.00183898	0.00215728	0.00229533	0.00318185	0.00328738	0.00336659	0.00319496	0.00315148	0.00241986	0.00195407	0.00204136	0.00203091	0.00160177	0.00154193
5.5	NaN	NaN	0.00245514	0.0032436	0.00335118	0.00341894	0.00373174	0.00371658	0.0029314	0.00301107	0.00281966	0.00291498	0.00332835	0.00343363	0.00322754	0.00374096	0.00322381	0.00302382	0.00266504	0.00271884	0.00278971	0.00300604	0.00262683	0.00313806	0.00334396	0.00402394	0.00371096	0.00383601	0.00400629	0.00395661	0.00380798	0.00364595	0.00320927	0.00247008	0.00207357	0.0016012	0.00187936	0.00225331	0.00307418	0.00331407	0.00282173	0.00257789	0.00208414	0.0017041	0.00133648	0.00145491	0.00152471	0.00150589	0.00122949
4.5	NaN	NaN	0.00250112	0.00332094	0.0033957	0.00323776	0.00378756	0.00375275	0.00295976	0.00311553	0.00297128	0.00301336	0.00348573	0.00331865	0.00352142	0.00371802	0.00335095	0.00296344	0.00268656	0.00268441	0.00269179	0.00259712	0.00280383	0.00328319	0.0033797	0.00423304	0.00437811	0.00420592	0.00436679	0.00377281	0.00337069	0.0035328	0.00302726	0.00226068	0.00204426	0.00154144	0.00183159	0.00226759	0.00306086	0.00276769	0.00281524	0.00231499	0.00173083	0.00164733	0.00146416	0.00117568	0.00144275	0.00134265	0.000810169
3.5	NaN	NaN	0.00266	0.00328464	0.00333137	0.00304446	0.00326874	0.00324481	0.00282168	0.00300716	0.002901	0.00309255	0.00329825	0.0035908	0.0031982	0.00348581	0.00253693	0.00268098	0.00215313	0.00269501	0.00283107	0.00310514	0.00341798	0.00371179	0.0036993	0.00427823	0.00361596	0.00385743	0.00338936	0.00324031	0.00315292	0.00354569	0.00251427	0.00195154	0.00186669	0.00121422	0.00114845	0.00171494	0.00252995	0.00248536	0.00239274	0.00268378	0.00161308	0.00175584	0.00145078	NaN	NaN	NaN	NaN
2.5	NaN	NaN	0.00279922	0.00337441	0.0031645	0.00294002	0.00325196	0.00306954	0.00259705	0.00284592	0.00287482	0.00334998	0.00381215	0.00415729	0.00397639	0.00439083	0.00309682	0.00245607	0.00217485	0.00250061	0.00257419	0.00345678	0.00305781	0.00335705	0.00379364	0.00491205	0.00349105	0.0029435	0.00135178	0.00121941	0.00145265	0.00138369	0.00166795	0.00141842	0.00150714	0.000540189	0.000492345	0.000687417	0.000655027	NaN	NaN	NaN	NaN	NaN	NaN	NaN	NaN	NaN	NaN
1.5	NaN	NaN	0.0022913	0.00297967	0.0029808	0.00279042	0.00295183	0.00349362	0.00274797	0.00322784	0.00315726	0.00373752	0.00437213	0.00404819	0.00412995	0.00376588	0.00319261	0.00338901	0.00245934	0.00296963	0.00451346	0.00327931	0.00392954	0.00533755	0.00218389	NaN	NaN	NaN	NaN	NaN	NaN	NaN	NaN	NaN	NaN	NaN	NaN	NaN	NaN	NaN	NaN	NaN	NaN	NaN	NaN	NaN	NaN	NaN	NaN
0.5	NaN	NaN	0.00323097	0.00365719	0.00341036	0.00284674	0.00303161	0.00435277	0.00438528	0.00232248	0.00279145	0.00222207	0.00334753	0.00369346	0.00369958	0.003318	0.00431723	NaN	NaN	NaN	NaN	NaN	NaN	NaN	NaN	NaN	NaN	NaN	NaN	NaN	NaN	NaN	NaN	NaN	NaN	NaN	NaN	NaN	NaN	NaN	NaN	NaN	NaN	NaN	NaN	NaN	NaN	NaN	NaN
-0.5	NaN	NaN	0.00429618	0.00431811	0.00475832	0.00437779	0.0033877	0.00460594	0.00262207	0.00319603	0.00285788	0.00260898	0.00355846	0.00378697	NaN	NaN	NaN	NaN	NaN	NaN	NaN	NaN	NaN	NaN	NaN	NaN	NaN	NaN	NaN	NaN	NaN	NaN	NaN	NaN	NaN	NaN	NaN	NaN	NaN	NaN	NaN	NaN	NaN	NaN	NaN	NaN	NaN	NaN	NaN
-1.5	NaN	NaN	0.00479277	0.00448045	0.00460953	0.00451481	0.00492627	0.00607273	0.00471067	0.00439147	0.0035575	0.00323836	0.00447636	0.0037604	0.00527877	NaN	NaN	NaN	NaN	NaN	NaN	NaN	NaN	NaN	NaN	NaN	NaN	NaN	NaN	NaN	NaN	NaN	NaN	NaN	NaN	NaN	NaN	NaN	NaN	NaN	NaN	NaN	NaN	NaN	NaN	NaN	NaN	NaN	NaN
-2.5	NaN	NaN	0.0044276	0.00462003	0.00462733	0.00522259	0.00564909	0.00531606	0.00410323	0.0056181	0.00451777	0.00357764	0.00481265	0.00468056	0.00485396	0.00475054	0.00471227	0.00540876	NaN	NaN	NaN	NaN	NaN	NaN	NaN	NaN	NaN	NaN	NaN	NaN	NaN	NaN	NaN	NaN	NaN	NaN	NaN	NaN	NaN	NaN	NaN	NaN	NaN	NaN	NaN	NaN	NaN	NaN	NaN
-3.5	NaN	NaN	0.00441247	0.00430107	0.00439483	0.00509264	0.00551663	0.00451154	0.00370826	0.00421128	0.00372832	0.00419917	0.00553815	0.00472643	0.00637303	0.00426686	0.00511408	0.00499965	0.00519837	NaN	NaN	NaN	NaN	NaN	NaN	NaN	NaN	NaN	NaN	NaN	NaN	NaN	NaN	NaN	NaN	NaN	NaN	NaN	NaN	NaN	NaN	NaN	NaN	NaN	NaN	NaN	NaN	NaN	NaN
-4.5	NaN	NaN	0.00428342	0.00426761	0.00426946	0.0049373	0.00512032	0.00483119	0.00430122	0.00500472	0.00451261	0.00556328	0.00623505	0.00538896	0.00509541	0.00566369	0.00527165	0.00473961	0.00473954	0.0027443	0.00140736	NaN	NaN	NaN	NaN	NaN	NaN	NaN	NaN	NaN	NaN	NaN	NaN	NaN	NaN	NaN	NaN	NaN	NaN	NaN	NaN	NaN	NaN	NaN	NaN	NaN	NaN	NaN	NaN
-5.5	NaN	NaN	0.00364065	0.0036734	0.00386911	0.00439637	0.004744	0.00473194	0.0047488	0.00532364	0.00540644	0.00462676	0.00521964	0.00459774	0.00425196	0.00462598	0.00513145	0.00457488	0.00445304	0.00269486	0.00190405	0.00210155	0.00203363	0.0017415	NaN	NaN	NaN	NaN	NaN	NaN	NaN	NaN	NaN	NaN	NaN	NaN	NaN	NaN	NaN	NaN	NaN	NaN	NaN	NaN	NaN	NaN	NaN	NaN	NaN
-6.5	NaN	NaN	0.00348928	0.00388941	0.00415368	0.00453087	0.00466558	0.00445026	0.00402221	0.00455455	0.00469899	0.00443031	0.0044405	0.00380394	0.00376894	0.0040264	0.00477598	0.00398259	0.00544292	0.00371	0.00247171	0.00314168	0.00296201	0.00313518	0.00286952	0.00328171	NaN	NaN	NaN	NaN	NaN	NaN	NaN	NaN	NaN	NaN	NaN	NaN	NaN	NaN	NaN	NaN	NaN	NaN	NaN	NaN	NaN	NaN	NaN
-7.5	NaN	NaN	0.00307811	0.00319968	0.00369738	0.00387107	0.00399704	0.00414354	0.00424508	0.00455722	0.00426821	0.00419371	0.00402109	0.00368899	0.00352413	0.00329275	0.00318585	0.00298458	0.00296552	0.00327315	0.00228258	0.00263827	0.00274041	0.00338171	0.00341149	0.00322735	0.00423236	0.00522391	NaN	NaN	NaN	NaN	NaN	NaN	NaN	NaN	NaN	NaN	NaN	NaN	NaN	NaN	NaN	NaN	NaN	NaN	NaN	NaN	NaN
-8.5	NaN	NaN	0.00324819	0.00336741	0.00361685	0.00397268	0.00412528	0.00417691	0.00401626	0.00421297	0.00447647	0.00396625	0.00429792	0.00372828	0.00332701	0.00325999	0.00264162	0.00236955	0.00289104	0.00286139	0.00300419	0.00305873	0.00281051	0.00301815	0.00327652	0.00376055	0.00439492	0.0045622	0.00478649	0.00586186	0.00761304	NaN	NaN	NaN	NaN	NaN	NaN	NaN	NaN	NaN	NaN	NaN	NaN	NaN	NaN	NaN	NaN	NaN	NaN
-9.5	NaN	NaN	0.00325218	0.00324144	0.00380437	0.00428143	0.00461064	0.00451562	0.0041455	0.00390277	0.00364879	0.00462715	0.00413803	0.00404409	0.00354978	0.0034995	0.0029487	0.00287989	0.00338345	0.00369397	0.00387638	0.0038737	0.00413454	0.00503125	0.00363418	0.00329656	0.00404082	0.00372692	0.00384916	0.00389586	0.00505914	NaN	NaN	NaN	NaN	NaN	NaN	NaN	NaN	NaN	NaN	NaN	NaN	NaN	NaN	NaN	NaN	NaN	NaN
-10.5	NaN	NaN	0.00311076	0.00357538	0.00383019	0.00407729	0.00410895	0.00433055	0.00374602	0.003358	0.00389698	0.00447045	0.00422452	0.00399951	0.00429941	0.00391574	0.00376956	0.00353573	0.00395345	0.005408	0.00401081	0.00423068	0.00474714	0.00588635	0.00460533	0.00406565	0.00526091	0.00516616	0.0030754	0.00312043	0.00377907	0.00381843	NaN	NaN	NaN	NaN	NaN	NaN	NaN	NaN	NaN	NaN	NaN	NaN	NaN	NaN	NaN	NaN	NaN
-11.5	NaN	NaN	0.00326303	0.00343348	0.00372734	0.00432713	0.00447728	0.00459902	0.00485786	0.00453597	0.00473821	0.00467802	0.00520914	0.00546783	0.00459338	0.00426829	0.00386172	0.00346503	0.00384229	0.00514567	0.00508617	0.00641878	0.00568813	0.00577647	0.00494457	0.00367321	0.00531166	0.00535961	0.00441853	0.00402562	0.00390181	0.00453427	NaN	NaN	NaN	NaN	NaN	NaN	NaN	NaN	NaN	NaN	NaN	NaN	NaN	NaN	NaN	NaN	NaN
-12.5	NaN	NaN	0.00393787	0.00343147	0.00407027	0.00439106	0.00472946	0.00447814	0.00452845	0.0043804	0.00512643	0.00507583	0.00622486	0.00619141	0.0054989	0.00556043	0.00433073	0.00434066	0.00401306	0.00531756	0.00440691	0.00411072	0.0039376	0.00513606	0.00399252	0.00328742	0.00500631	0.00404972	0.00297438	0.00358573	0.00366486	NaN	NaN	NaN	NaN	NaN	NaN	NaN	NaN	NaN	NaN	NaN	NaN	NaN	NaN	NaN	NaN	NaN	NaN
-13.5	NaN	NaN	0.00339486	0.00349569	0.00386032	0.00409718	0.00430257	0.00425142	0.00438646	0.00424754	0.00482009	0.00540301	0.00534887	0.00635966	0.0048381	0.00455416	0.00512282	0.00364129	0.00481284	0.00646071	0.00450863	0.00490182	0.00501887	0.00490449	0.00384556	0.00286836	0.00270518	0.00334021	NaN	NaN	NaN	NaN	NaN	NaN	NaN	NaN	NaN	NaN	NaN	NaN	NaN	NaN	NaN	NaN	NaN	NaN	NaN	NaN	NaN
-14.5	NaN	NaN	0.00317184	0.00292718	0.0025449	0.00295775	0.00355876	0.00375416	0.00398749	0.00438128	0.00454358	0.00408277	0.00528016	0.00449627	0.00394539	0.00411268	0.00445361	0.0032639	0.00316504	0.00373582	0.00349483	0.00380127	0.00409833	0.00437567	0.00336954	0.00308211	0.00478961	NaN	NaN	NaN	NaN	NaN	NaN	NaN	NaN	NaN	NaN	NaN	NaN	NaN	NaN	NaN	NaN	NaN	NaN	NaN	NaN	NaN	NaN
-15.5	NaN	NaN	0.00297506	0.00247615	0.00179826	0.00220497	0.00307204	0.00262366	0.00315007	0.00363487	0.00375333	0.00264543	0.00341001	0.00392088	0.00345786	0.00380446	0.00366807	0.00254535	0.00225694	0.00254074	0.00198853	0.00185189	0.00224009	0.00342634	0.00513778	0.00196958	0.00352362	NaN	NaN	NaN	NaN	NaN	NaN	NaN	NaN	NaN	NaN	NaN	NaN	NaN	NaN	NaN	NaN	NaN	NaN	NaN	NaN	NaN	NaN
-16.5	NaN	NaN	0.0033504	0.00238503	0.00151188	0.00126563	0.00110549	0.00130975	0.00181497	0.00223284	0.002192	0.00157188	0.00175752	0.00273626	0.00251337	0.00242642	0.00221951	0.00244919	0.00164863	0.00262208	0.00123614	0.00101486	0.00126599	0.00271734	0.00340793	0.00124218	NaN	NaN	NaN	NaN	NaN	NaN	NaN	NaN	NaN	NaN	0.0028306	0.00315664	0.00336919	0.00399145	0.00540235	0.0049665	0.00477577	0.00375832	NaN	NaN	NaN	NaN	NaN
-17.5	NaN	NaN	0.00265026	0.00152953	0.000832652	0.000652577	0.000638792	0.000700021	0.000758886	0.000957683	0.000655355	0.000836926	0.00149836	0.00146893	0.0016355	0.00191112	0.00227723	0.00186785	0.00213739	0.00213214	0.001268	0.000754183	0.000706552	0.000373009	0.00171661	0.000477476	0.00479384	NaN	NaN	NaN	NaN	NaN	NaN	NaN	NaN	0.000751137	0.00121752	0.00223591	0.00219685	0.0029215	0.00437766	0.00385978	0.00380179	0.00323965	0.00218784	0.00168338	0.00156082	NaN	NaN
-18.5	NaN	NaN	0.00214526	0.00111131	0.00076392	0.000524448	0.000474166	0.000610424	0.000657274	0.000924134	0.000787607	0.000632665	0.000850904	0.00100554	0.00119229	0.0014604	0.00182172	0.00262497	0.000924367	0.000793332	0.000611557	0.000491123	0.000544396	0.000564679	0.000822243	0.00160912	0.00174446	0.00332109	NaN	NaN	NaN	NaN	NaN	NaN	0.00083333	0.000601162	0.00117892	0.00173196	0.00181848	0.00210079	0.0035073	0.00338424	0.00329265	0.00278798	0.00247451	0.00199092	0.00139428	0.00113648	0.000894295
-19.5	NaN	NaN	0.00194034	0.000839024	0.000689051	0.000485294	0.000797098	0.000589607	0.000831748	0.000735913	0.000511187	0.000630548	0.000874331	0.000946227	0.00178992	0.00148279	0.00151944	0.00121471	0.000697736	0.000791203	0.000672448	0.000526896	0.000419418	0.000557297	0.000795513	0.00106922	0.00106924	0.00128221	0.000383731	NaN	NaN	NaN	0.000624717	0.000820501	0.000661943	0.000892359	0.000978722	0.00102249	0.00100161	0.00127078	0.00256213	0.00222923	0.00212905	0.00206801	0.00206207	0.00232197	0.00155622	0.00112486	0.00105811
-20.5	NaN	NaN	0.00129903	0.000882576	0.000814653	0.000558493	0.000466799	0.000596912	0.000994615	0.000733664	0.000496016	0.000453518	0.000655381	0.000587024	0.00107647	0.00096696	0.000738748	0.000394237	0.000434027	0.000511747	0.00032364	0.000400851	0.000507482	0.00042526	0.000600083	0.000516307	0.000663603	0.00064546	0.000730742	0.000530532	0.00051354	0.00038799	0.000814612	0.00131364	0.00095771	0.00121791	0.00120044	0.00087344	0.000866413	0.00091142	0.00109914	0.00146728	0.00140683	0.00154951	0.00186772	0.00187803	0.00145605	0.00127993	0.000981106
-21.5	NaN	NaN	0.000997957	0.000972262	0.00100236	0.000839509	0.000628796	0.000659305	0.000798862	0.000873618	0.000533334	0.000520239	0.000552166	0.000376219	0.000438384	0.000594032	0.000344752	0.000179983	0.000195726	0.000199306	0.000175068	0.000292368	0.000359803	0.000508928	0.000425914	0.000566034	0.000566798	0.000647981	0.000469414	0.00036459	0.000312865	0.000331358	0.000533135	0.00082765	0.000815437	0.000860603	0.00109686	0.000856451	0.000908426	0.000999841	0.000959555	0.00117741	0.00123926	0.00129249	0.00133341	0.00122309	0.0012962	0.0011616	0.00101227
-22.5	NaN	NaN	0.00102134	0.000947618	0.00106313	0.000763273	0.00075219	0.000696887	0.000592296	0.00053818	0.00043915	0.000376191	0.000613514	0.000468281	0.000289904	0.000362779	0.000327707	0.000136504	0.00013178	0.000199754	0.000226216	0.000295744	0.000273775	0.000366759	0.000481254	0.000496554	0.000408813	0.000494471	0.000365707	0.000262791	0.000282013	0.000272536	0.000464043	0.000640121	0.000532978	0.000687133	0.000826576	0.000713188	0.00077662	0.000699289	0.000663629	0.000854135	0.000795932	0.00100256	0.00103714	0.00097468	0.000973791	0.00109312	0.000920499
-23.5	NaN	NaN	0.000791255	0.0008429	0.000742818	0.000784829	0.000971822	0.000934012	0.000867679	0.000687039	0.000405323	0.000334268	0.000495335	0.000425607	0.000228877	0.000363542	0.000346124	0.000153486	0.000113578	0.000160579	0.000149671	0.000177019	0.000208586	0.000258383	0.000367131	0.000421236	0.000393901	0.000356277	0.000296369	0.000231815	0.000254185	0.000305254	0.000423051	0.000654938	0.000549226	0.000656427	0.000811073	0.000690359	0.00078347	0.000736193	0.000668143	0.000636431	0.000638759	0.000716482	0.000802727	0.000860471	0.000944395	0.000978073	0.000790469
-24.5	NaN	NaN	0.000569566	0.000654611	0.000816742	0.000704661	0.000633288	0.000712559	0.000653522	0.000532367	0.000434494	0.000331986	0.000399285	0.000253341	0.000143812	0.000214664	0.000225561	0.000125128	9.24359e-05	9.78021e-05	9.20085e-05	0.000105865	0.000145233	0.000206648	0.000166024	0.000331579	0.00028581	0.000337561	0.00028999	0.000268965	0.000293372	0.000404456	0.000496896	0.000531036	0.000593585	0.000640607	0.000584381	0.000463821	0.000510923	0.00057428	0.0005253	0.000417534	0.000490818	0.000680769	0.00073104	0.000828072	0.000806579	0.000950588	0.000795112
-25.5	NaN	NaN	0.000418145	0.000398275	0.000644861	0.00062543	0.000696066	0.000634209	0.00083812	0.000514282	0.000362443	0.000342276	0.000376734	0.000273447	0.000204752	0.000196343	0.000216511	0.000107396	7.60238e-05	8.29686e-05	8.62647e-05	0.000134079	0.000115965	0.000145632	0.000174525	0.00024498	0.000293068	0.00032932	0.000389127	0.000378669	0.000358668	0.000428346	0.000468729	0.000524702	0.000626071	0.000538572	0.000463957	0.000450345	0.000470442	0.000434374	0.000362168	0.000314924	0.000337667	0.000480577	0.000661715	0.000781208	0.000734571	0.000608998	0.000523084
-26.5	NaN	NaN	0.000322764	0.00039385	0.000506086	0.0005595	0.000552725	0.000625294	0.000613213	0.000478543	0.000326809	0.000273744	0.000212684	0.00019257	0.000148588	0.000177821	0.000151899	0.000110958	6.97911e-05	7.299e-05	5.81054e-05	7.69165e-05	0.000121553	9.3134e-05	0.000113359	0.000219376	0.000194818	0.000260505	0.000481995	0.000463902	0.000323609	0.00037275	0.000317062	0.000342908	0.00040752	0.000380501	0.000392633	0.000408716	0.000413188	0.000358504	0.000265496	0.000214667	0.000227475	0.000279448	0.000484692	0.000657844	0.000668605	0.000599682	0.00038688
-27.5	NaN	NaN	0.000436088	0.000399697	0.00045037	0.000575277	0.000448535	0.000526668	0.000468943	0.000332281	0.000283798	0.000264945	0.000246895	0.000208255	0.000178991	0.000153582	0.000142093	0.000101597	8.94237e-05	7.83743e-05	5.57971e-05	5.51209e-05	7.02652e-05	6.52331e-05	6.53451e-05	0.000171109	0.000231324	0.000318578	0.000480151	0.000391776	0.000347589	0.000331714	0.000265483	0.000242932	0.000292311	0.000289028	0.000319325	0.00031936	0.000330756	0.000305776	0.000245836	0.000216928	0.000248849	0.000260246	0.000325672	0.000399165	0.000469702	0.000465563	0.000360893
-28.5	NaN	NaN	0.000364787	0.000297367	0.000321381	0.0003422	0.000410185	0.000360269	0.000232328	0.00024543	0.000219791	0.00025649	0.000264886	0.000255688	0.000197035	0.000174411	0.000147793	0.000114898	0.000107637	7.57197e-05	6.2356e-05	6.59418e-05	7.80886e-05	5.03126e-05	8.78892e-05	0.000155758	0.000203975	0.00027947	0.000373001	0.000329287	0.000204695	0.00020555	0.000157386	0.000145113	0.000167527	0.000206326	0.000249336	0.000258055	0.000278259	0.000275639	0.000204871	0.000207781	0.000209313	0.000178046	0.000218516	0.000254034	0.000287718	0.000316853	0.000277796
-29.5	NaN	NaN	0.000436786	0.000445181	0.000409877	0.000318772	0.000287132	0.000455637	0.000437357	0.000402204	0.000320155	0.000352429	0.000321984	0.000264499	0.000213435	0.000183172	0.000131409	9.94481e-05	9.29562e-05	8.65777e-05	0.000110022	0.000117315	0.0001092	5.66466e-05	0.000107961	0.000180034	0.000250817	0.000390827	0.000433842	0.000264872	0.000162178	0.00014316	0.000107763	0.000110543	9.83811e-05	0.000214059	0.000294077	0.00032499	0.000332119	0.00032754	0.000309146	0.000312271	0.000269015	0.000223564	0.000233162	0.000217316	0.000240149	0.000267201	0.000226039
-30.5	NaN	NaN	0.000472502	0.000471495	0.000530901	0.000301334	0.000292716	0.000320069	0.000285853	0.000322999	0.000431986	0.000549936	0.000315743	0.000270536	0.0001749	0.000139734	0.000136847	0.000102314	0.000128408	0.000139201	0.00010878	0.000133673	0.000173175	5.41394e-05	0.000111848	0.000176119	0.000319178	0.000311661	0.000315825	0.000269202	0.000211376	0.000170013	0.000175622	0.000150757	0.000117205	0.000232838	0.00043832	0.000514998	0.000527518	0.000540258	0.000285528	0.000322144	0.00027703	0.000224286	0.000243403	0.000267936	0.000257475	0.00026377	0.000288122
-31.5	NaN	NaN	0.000744269	0.000644442	0.000357032	0.000315239	0.000392835	0.000444362	0.000411016	0.000456267	0.000580247	0.000466342	0.000429291	0.000429347	0.000254148	0.000219166	0.000184909	0.000144259	0.000174272	0.000117733	0.000176139	0.000117273	0.000237964	8.31633e-05	9.74191e-05	0.000137682	0.000208153	0.000326552	0.000381925	0.000363435	0.000281464	0.00024549	0.000185992	0.000176386	0.000253981	0.000590481	0.000557346	0.000696837	0.000687155	0.00050489	0.000321332	0.000363136	0.000269445	0.000275516	0.00030058	0.000297317	0.000257344	0.00024495	0.000197326
-32.5	NaN	NaN	0.000495863	0.000633015	0.000490982	0.000425462	0.000407797	0.000397146	0.00051994	0.000470293	0.000658976	0.000725675	0.000439542	0.000389659	0.000415664	0.000274161	0.000289491	0.000433883	0.000215481	0.000158657	0.000191099	0.000147036	0.000143813	0.000124728	0.000136787	0.000127596	0.000183468	0.000262106	0.000248147	0.000297743	0.000278177	0.000212521	0.000332365	0.000259732	0.000320816	0.000545183	0.000744426	0.00149887	0.000952424	0.00062354	0.000356127	0.000379643	0.000326058	0.000245286	0.000288451	0.00031682	0.000278849	0.000258753	0.00028813
-33.5	NaN	NaN	0.000627117	0.000539519	0.000814733	0.000659201	0.000487122	0.000534913	0.000528618	0.000503641	0.000642688	0.000803031	0.000475391	0.000475354	0.000329761	0.000255136	0.000446844	0.000295962	0.000346435	0.000261214	0.000165567	0.000171406	0.000221583	0.00016008	0.000151694	0.000141811	0.00025002	0.00026577	0.000344199	0.000297582	0.000296423	0.000287009	0.000209785	0.000234455	0.000362888	0.00055864	0.00143037	0.00126313	0.00225904	0.00070841	0.000542258	0.000433318	0.000482685	0.000333716	0.000431111	0.000338564	0.000557408	0.000409713	0.00048247
-34.5	NaN	NaN	0.000802562	0.0010312	0.000878823	0.000781811	0.000749339	0.000448445	0.000587748	0.000616359	0.00070249	0.000488263	0.000533389	0.000516883	0.000335646	0.000500684	0.000507826	0.000460547	0.00066629	0.000417193	0.000242125	0.000371902	0.000419297	0.000265064	0.000183456	0.000154418	0.000198011	0.000203187	0.000315759	0.000344404	0.000269234	0.000368478	0.000264831	0.000328889	0.000667144	0.000521828	0.00106159	0.00108511	0.00148682	0.000677564	0.00100606	0.000439008	0.0005059	0.000510938	0.000348078	0.000556419	0.000410905	0.000434201	0.000681849
-35.5	NaN	NaN	0.000632646	0.000641768	0.000570109	0.000496223	0.000549615	0.000746078	0.000549007	0.000573194	0.00081065	0.000871973	0.000866513	0.00065161	0.000439877	0.000646839	0.00059675	0.000489743	0.000461105	0.000442841	0.000424581	0.000318607	0.000285772	0.000487699	0.000133506	0.000170244	0.0001304	0.000225818	0.000586161	0.000324867	0.000369738	0.000472226	0.000598535	0.000859778	0.000534383	0.00058703	0.000748638	0.00158735	0.00125172	0.000602461	0.000688566	0.000396091	0.000444147	0.000613147	0.00078749	0.000618847	0.000860297	0.000536601	0.00057949
-36.5	NaN	NaN	0.000599512	0.000938773	0.00111778	0.000599634	0.000822678	0.000780439	0.000457705	0.000618921	0.000833013	0.000843787	0.000803896	0.000648548	0.000765573	0.0013567	0.00123169	0.00100526	0.000553809	0.000852383	0.00054925	0.000418178	0.000482799	0.000307307	0.000226759	0.000336894	0.000322869	0.00017801	0.000394227	0.000468919	0.000261425	0.000379425	0.000415445	0.000541799	0.000615707	0.000661352	0.000762878	0.00100857	0.000862233	0.000623234	0.00043834	0.000404983	0.000422214	0.000611354	0.000560916	0.000660239	0.00105538	0.0016267	0.000883312
-37.5	NaN	NaN	0.00106107	0.00132192	0.00108167	0.00161322	0.00238164	0.00112774	0.000710597	0.000847245	0.00127678	0.00076169	0.000530973	0.000606051	0.000599573	0.000508	0.000400555	0.000359955	0.000294975	0.0004768	0.000505132	0.000343279	0.000341028	0.000339806	0.000279202	0.000256139	0.000288727	0.000484533	0.000399749	0.000363836	0.000324925	0.000456811	0.000439837	0.000615225	0.000860282	0.000581434	0.000772168	0.000840806	0.000980488	0.00088635	0.00080973	0.000449456	0.00072332	0.000748582	0.00071444	0.00114538	0.00204326	0.00172015	0.00160684
-38.5	NaN	NaN	0.00141826	0.0021317	0.00157508	0.00197517	0.0021681	0.00163142	0.00153634	0.00100862	0.00097468	0.00100086	0.000546667	0.000810185	0.000438351	0.000481236	0.000379543	0.000238584	0.000428091	0.000879062	0.000358577	0.000235308	0.000299232	0.000366082	0.000292673	0.000495635	0.000419154	0.000636975	0.000925738	0.000984326	0.00126316	0.00120984	0.000934015	0.000874146	0.0014307	0.00056374	0.00111691	0.000982092	0.00130991	0.000929346	0.000721775	0.000525934	0.000738611	0.000964629	0.00131248	0.00106317	0.000761723	0.000852195	0.00169257
-39.5	NaN	NaN	0.00138456	0.00162548	0.00228646	0.00189047	0.00174692	0.00130434	0.00114462	0.000809612	0.000732876	0.000818881	0.000591927	0.00104705	0.000930136	0.000592841	0.000857786	0.000581434	0.000244715	0.000202421	0.000267436	0.000195932	0.000151192	0.000367933	0.000302038	0.0024299	0.00132092	0.000918309	0.00106425	0.00125751	0.00302338	0.00180313	0.00121672	0.00103864	0.00133743	0.00103885	0.000945716	0.000655907	0.000794594	0.000806094	0.000556131	0.00153803	0.00190753	0.000587119	0.00087086	0.000692678	0.000554323	0.000850944	0.000968316
-40.5	NaN	NaN	0.00166308	0.00157096	0.00200202	0.00349046	0.0019568	0.00112806	0.000891119	0.000602587	0.000500356	0.000593898	0.000808602	0.00130033	0.00107754	0.000757979	0.000477865	0.00019583	0.000187846	0.000332785	0.000136214	0.000178809	0.000248191	0.000204771	0.000611482	0.000672095	0.000703696	0.000800014	0.00143137	0.00154466	0.00200906	0.0026472	0.0018326	0.00129316	0.00141439	0.00146452	0.00112437	0.00114361	0.000928426	0.00128611	0.00200485	0.0021431	0.00147779	0.0012886	0.000623842	0.000525111	0.00037235	0.000580416	0.000993693
-41.5	NaN	NaN	0.00225477	0.000959244	0.000949334	0.00125003	0.0014129	0.00078285	0.000803724	0.00110791	0.000730885	0.000724103	0.00111803	0.000617121	0.000725754	0.000401853	0.000331452	0.000161473	0.00013709	0.000185386	0.000128598	0.00014239	0.000216418	0.000316877	0.000668489	0.000904144	0.000826163	0.0014512	0.00168825	0.0017318	0.00206867	0.00285656	0.00283804	0.00117741	0.00181366	0.00118955	0.00104977	0.000662932	0.00134941	0.00168037	0.00251315	0.0024491	0.00171948	0.0010825	0.000445786	0.000353062	0.000251841	0.00035827	0.000606516
-42.5	NaN	NaN	0.00265745	0.000876731	0.000586911	0.000528813	0.00187009	0.00113485	0.0012518	0.000967048	0.00113299	0.00114147	0.001306	0.000910346	0.0008729	0.000421221	0.00033021	0.000222082	0.000230647	0.000173831	0.000105297	0.000203741	0.00027046	0.000329223	0.000671183	0.00091718	0.000805134	0.000933229	0.00105251	0.00163044	0.00235147	0.00220996	0.00151636	0.00125517	0.00240584	0.00165109	0.000926714	0.000741772	0.00176417	0.000969722	0.00105417	0.0027317	0.00160191	0.00119362	0.000477822	0.00043233	0.00026801	0.000258189	0.000442741
-43.5	NaN	NaN	0.00304215	0.000789134	0.000587705	0.00151909	0.00148186	0.00142177	0.00119152	0.000750812	0.00104318	0.00141106	0.00142952	0.000940742	0.00120933	0.000593143	0.000550729	0.000416278	0.000351832	0.00014381	9.64121e-05	0.000149303	0.000251648	0.000233951	0.000790261	0.000983634	0.000989192	0.000905973	0.000974217	0.000883266	0.00117855	0.00173532	0.00126043	0.00180268	0.00255984	0.00244548	0.00130251	0.00110051	0.00185437	0.00153106	0.00142791	0.00133932	0.00209926	0.00135616	0.000507227	0.000407245	0.000277296	0.000422032	0.000492241
-44.5	NaN	NaN	0.00307776	0.000818014	0.00186203	0.00153888	0.00132193	0.00134707	0.00104252	0.000897643	0.00172142	0.0010659	0.00111365	0.00109765	0.00128339	0.000579039	0.000420726	0.000327942	0.000262049	0.000154247	8.28758e-05	0.000122479	0.000124678	0.000298482	0.000624168	0.00107267	0.000784031	0.000787766	0.00084252	0.000425907	0.000588264	0.00097814	0.00110892	0.00110183	0.0028314	0.00439838	0.00224226	0.0014566	0.00137743	0.0013776	0.000686307	0.00114052	0.00141739	0.000705404	0.000357505	0.000372352	0.000295297	0.00047517	0.000487693
-45.5	NaN	NaN	0.00192186	0.00101725	0.000827704	0.000837163	0.000891088	0.0013316	0.00113862	0.000867613	0.0012972	0.0020687	0.00173498	0.00186744	0.00191089	0.000716142	0.000402481	0.000341904	0.000354505	0.000191115	0.000239599	0.00017711	0.000306711	0.000384801	0.000410459	0.000726541	0.00127905	0.000671618	0.000570188	0.00046878	0.000832395	0.000978626	0.00119235	0.00105269	0.00226195	0.00314915	0.00285732	0.00225081	0.00148003	0.00115325	0.000649365	0.00122102	0.00056743	0.000631562	0.000595858	0.000541714	0.000570296	0.000742886	0.000913575
-46.5	NaN	NaN	0.00214081	0.0015257	0.00145785	0.00148895	0.00125968	0.00172705	0.00142047	0.00198342	0.00213454	0.00279647	0.00333974	0.00434109	0.00489733	0.0014205	0.000598561	0.000349594	0.000192113	0.000206669	0.000321979	0.000326178	0.000594717	0.000351666	0.000620148	0.00098975	0.00114217	0.000955693	0.000589689	0.000471798	0.00078221	0.00072484	0.00065463	0.000572771	0.00156672	0.00179607	0.00372988	0.00379593	0.002367	0.0015932	0.00085684	0.00164565	0.00141709	0.000950387	0.00108961	0.000629478	0.000738807	0.000783515	0.000855343
-47.5	NaN	NaN	0.00193012	0.0012814	0.00114826	0.00194962	0.00348033	0.00139446	0.00150284	0.00153442	0.00321002	0.0041219	0.00448902	0.00374465	0.00331591	0.0030911	0.000592077	0.000295159	0.000189157	0.000166978	0.00018034	0.000258318	0.000305928	0.000398607	0.000402451	0.000808476	0.000753684	0.00122341	0.000672797	0.000517119	0.000585782	0.000447968	0.000499217	0.000489899	0.00231078	0.0022409	0.00220585	0.00218852	0.00252826	0.00235381	0.00171071	0.00262359	0.00165866	0.00128803	0.000899191	0.000995364	0.000547758	0.000671367	0.000861038
-48.5	NaN	NaN	NaN	NaN	NaN	NaN	NaN	NaN	NaN	NaN	NaN	NaN	NaN	NaN	NaN	NaN	NaN	NaN	NaN	NaN	NaN	NaN	NaN	NaN	NaN	NaN	NaN	NaN	NaN	NaN	NaN	NaN	NaN	NaN	NaN	NaN	NaN	NaN	NaN	NaN	NaN	NaN	NaN	NaN	NaN	NaN	NaN	NaN	NaN
-49.5	NaN	NaN	NaN	NaN	NaN	NaN	NaN	NaN	NaN	NaN	NaN	NaN	NaN	NaN	NaN	NaN	NaN	NaN	NaN	NaN	NaN	NaN	NaN	NaN	NaN	NaN	NaN	NaN	NaN	NaN	NaN	NaN	NaN	NaN	NaN	NaN	NaN	NaN	NaN	NaN	NaN	NaN	NaN	NaN	NaN	NaN	NaN	NaN	NaN
NaN	-179.5	-178.5	-177.5	-176.5	-175.5	-174.5	-173.5	-172.5	-171.5	-170.5	-169.5	-168.5	-167.5	-166.5	-165.5	-164.5	-163.5	-162.5	-161.5	-160.5	-159.5	-158.5	-157.5	-156.5	-155.5	-154.5	-153.5	-152.5	-151.5	-150.5	-149.5	-148.5	-147.5	-146.5	-145.5	-144.5	-143.5	-142.5	-141.5	-140.5	-139.5	-138.5	-137.5	-136.5	-135.5	-134.5	-133.5	-132.5	-131.5
[truncated: 311 more columns]

## Sheet: beta
49.5	NaN	NaN	NaN	NaN	NaN	NaN	NaN	NaN	NaN	NaN	NaN	NaN	NaN	NaN	NaN	NaN	NaN	NaN	NaN	NaN	NaN	NaN	NaN	NaN	NaN	NaN	NaN	NaN	NaN	NaN	NaN	NaN	NaN	NaN	NaN	NaN	NaN	NaN	NaN	NaN	NaN	NaN	NaN	NaN	NaN	NaN	NaN	NaN	NaN
48.5	NaN	NaN	NaN	NaN	NaN	NaN	NaN	NaN	NaN	NaN	NaN	NaN	NaN	NaN	NaN	NaN	NaN	NaN	NaN	NaN	NaN	NaN	NaN	NaN	NaN	NaN	NaN	NaN	NaN	NaN	NaN	NaN	NaN	NaN	NaN	NaN	NaN	NaN	NaN	NaN	NaN	NaN	NaN	NaN	NaN	NaN	NaN	NaN	NaN
47.5	NaN	NaN	1.12071	1.11672	1.12605	1.11429	1.12972	1.14733	1.18503	1.2019	1.23693	1.26658	1.33213	1.35799	1.36058	1.4211	1.46339	1.48846	1.54322	1.57546	1.57046	1.58966	1.55658	1.51114	1.4407	1.42197	1.36287	1.3722	1.37007	1.33869	1.31233	1.30421	1.31316	1.305	1.29876	1.34127	1.20918	1.26605	1.27603	1.2214	1.23689	1.31878	1.25788	1.17598	1.0951	1.14197	1.13973	1.20644	1.19147
46.5	NaN	NaN	1.16674	1.20384	1.17393	1.1097	1.10633	1.10407	1.15818	1.14396	1.16802	1.23887	1.35809	1.34338	1.37145	1.48052	1.52532	1.54002	1.59575	1.60076	1.57519	1.62248	1.58101	1.52389	1.4419	1.41464	1.37823	1.35834	1.39824	1.34072	1.32977	1.31934	1.28459	1.27612	1.27219	1.32828	1.25082	1.27373	1.28082	1.23813	1.17491	1.20343	1.1359	0.926195	1.02385	1.07171	1.13291	1.2051	1.20149
45.5	NaN	NaN	1.23013	1.31284	1.321	1.24521	1.16532	1.10155	1.11236	1.09232	1.16123	1.24806	1.31886	1.35927	1.36353	1.45665	1.50167	1.51082	1.55402	1.54487	1.54756	1.53145	1.5145	1.47493	1.46861	1.44068	1.39623	1.41819	1.41763	1.33091	1.27921	1.26826	1.2265	1.19142	1.21901	1.27666	1.23951	1.28716	1.30527	1.26573	1.15017	1.09431	1.06196	0.9203	0.979845	1.09767	1.12478	1.21569	1.2093
44.5	NaN	NaN	1.25147	1.30279	1.29471	1.25086	1.15396	1.13488	1.13027	1.14393	1.17161	1.25608	1.29834	1.33781	1.31577	1.356	1.36742	1.38657	1.41501	1.43639	1.49943	1.49326	1.5027	1.48768	1.46932	1.404	1.41771	1.42577	1.4668	1.38767	1.30319	1.3159	1.314	1.27665	1.28876	1.35737	1.36191	1.34184	1.33081	1.22084	1.09298	1.04536	1.01636	0.887391	1.01038	1.13959	1.22073	1.21393	1.19625
43.5	NaN	NaN	1.22494	1.20707	1.24473	1.16178	1.12073	1.11651	1.1194	1.15841	1.20978	1.28248	1.31568	1.31126	1.26766	1.2812	1.31088	1.3119	1.32283	1.39632	1.46641	1.50066	1.52694	1.51349	1.50193	1.45258	1.43569	1.4405	1.4608	1.38271	1.32164	1.35931	1.3207	1.26993	1.31076	1.40493	1.39898	1.36806	1.34139	1.29584	1.14815	0.997968	1.02435	0.952118	1.06981	1.23721	1.27493	1.24978	1.23212
42.5	NaN	NaN	1.18313	1.17481	1.159	1.22945	1.20465	1.21221	1.21165	1.20676	1.21296	1.23149	1.23236	1.26631	1.22677	1.25542	1.26695	1.29968	1.30658	1.38534	1.46803	1.48505	1.52044	1.52576	1.47066	1.42929	1.42426	1.38947	1.39562	1.34213	1.2948	1.33641	1.35951	1.28587	1.32926	1.39216	1.40534	1.36595	1.36625	1.29185	1.11886	0.975555	0.879474	1.016	1.10163	1.24442	1.39013	1.32184	1.16343
41.5	NaN	NaN	1.13817	1.15156	1.18792	1.21577	1.22174	1.20248	1.22675	1.2358	1.17077	1.18972	1.20889	1.24874	1.2001	1.23916	1.2324	1.23028	1.28614	1.37314	1.46791	1.48809	1.5032	1.51707	1.42873	1.37172	1.36608	1.34074	1.34313	1.32368	1.29228	1.2709	1.34452	1.34261	1.33754	1.4226	1.4265	1.41706	1.39372	1.30257	1.15579	1.02679	1.10038	NaN	NaN	NaN	1.46984	1.13338	1.26275
40.5	NaN	NaN	1.14337	1.15285	1.12171	1.2254	1.21337	1.21581	1.23235	1.21546	1.15125	1.13974	1.18085	1.16128	1.11899	1.16252	1.1351	1.15347	1.19334	1.33754	1.41654	1.41091	1.44167	1.44124	1.37029	1.32161	1.38276	1.33523	1.35027	1.37739	1.29027	1.29523	1.32782	1.30633	1.36297	1.42574	1.42413	1.43333	1.42564	1.27313	1.2426	1.17138	NaN	NaN	NaN	NaN	NaN	1.33417	1.36871
39.5	NaN	NaN	1.20138	1.1938	1.16211	1.22419	1.23351	1.23085	1.26209	1.24121	1.16485	1.15103	1.13804	1.12037	1.16551	1.2028	1.25257	1.22329	1.26503	1.38673	1.41014	1.41386	1.50679	1.48198	1.38148	1.35535	1.36823	1.3253	1.32877	1.32926	1.29829	1.24868	1.35307	1.32938	1.34364	1.31299	1.36222	1.31492	1.34317	1.2977	1.15644	NaN	NaN	NaN	NaN	NaN	NaN	NaN	NaN
38.5	NaN	NaN	1.31566	1.26821	1.28933	1.32412	1.2967	1.26011	1.25508	1.18519	1.16285	1.17356	1.16751	1.18927	1.18559	1.2517	1.28531	1.30455	1.31194	1.40025	1.42272	1.40138	1.43289	1.41596	1.32289	1.28891	1.26064	1.26982	1.25873	1.29946	1.24515	1.16521	1.28764	1.23973	1.21253	1.26063	1.36086	NaN	NaN	NaN	NaN	NaN	NaN	NaN	NaN	NaN	NaN	NaN	NaN
37.5	NaN	NaN	1.39952	1.37682	1.40073	1.42001	1.31909	1.28924	1.22618	1.16081	1.12016	1.21453	1.24731	1.24459	1.24041	1.32051	1.33848	1.36711	1.35819	1.40171	1.39903	1.3412	1.35578	1.35362	1.2455	1.28166	1.33684	1.23921	1.24387	1.2942	1.21457	1.27724	1.30275	1.25667	1.19064	NaN	NaN	NaN	NaN	NaN	NaN	NaN	NaN	NaN	NaN	NaN	NaN	NaN	NaN
36.5	NaN	NaN	1.36012	1.31306	1.39858	1.42055	1.34357	1.29922	1.21354	1.19184	1.15239	1.1916	1.19165	1.23088	1.29401	1.34734	1.3591	1.36793	1.36358	1.38134	1.35542	1.32104	1.40261	1.49519	1.31695	1.42085	1.14841	1.14258	1.14783	1.14975	1.08809	1.26511	1.28104	NaN	NaN	NaN	NaN	NaN	NaN	NaN	NaN	NaN	NaN	NaN	NaN	NaN	NaN	NaN	NaN
35.5	NaN	NaN	1.39298	1.40699	1.44344	1.4547	1.37645	1.28943	1.25779	1.18564	1.14718	1.14989	1.15984	1.19306	1.30622	1.37757	1.36211	1.42181	1.40736	1.42217	1.37879	1.46629	1.40003	1.39449	1.32191	1.25702	1.33064	1.21824	1.18124	1.22319	1.23087	1.12087	1.34024	NaN	NaN	NaN	NaN	NaN	NaN	NaN	NaN	NaN	NaN	NaN	NaN	NaN	NaN	NaN	NaN
34.5	NaN	NaN	1.39468	1.42642	1.46405	1.45048	1.33235	1.29022	1.23799	1.18383	1.09995	1.1156	1.10696	1.17128	1.1971	1.31164	1.30387	1.35805	1.40178	1.37153	1.48417	1.49908	1.42673	1.41192	1.42419	1.35419	1.38889	1.2706	1.27087	1.25905	1.23272	1.01945	NaN	NaN	NaN	NaN	NaN	NaN	NaN	NaN	NaN	NaN	NaN	NaN	NaN	NaN	NaN	NaN	NaN
33.5	NaN	NaN	1.33325	1.34752	1.35077	1.29569	1.19993	1.18026	1.16575	1.14097	1.13717	1.12354	1.11866	1.14896	1.17242	1.20624	1.24386	1.26334	1.34554	1.44528	1.43388	1.31059	1.2792	1.27213	1.30548	1.18756	1.27216	1.28005	1.30078	1.4732	1.32519	1.25699	NaN	NaN	NaN	NaN	NaN	NaN	NaN	NaN	NaN	NaN	NaN	NaN	NaN	NaN	NaN	NaN	NaN
32.5	NaN	NaN	1.29107	1.27115	1.28587	1.17266	1.12949	1.13777	1.13771	1.13959	1.16939	1.19601	1.09204	1.11998	1.06152	1.12038	1.13445	1.18113	1.27777	1.29729	1.32179	1.32829	1.31509	1.2315	1.27926	1.22996	1.28689	1.30849	1.47862	1.38198	1.50686	NaN	NaN	NaN	NaN	NaN	NaN	NaN	NaN	NaN	NaN	NaN	NaN	NaN	NaN	NaN	NaN	NaN	NaN
31.5	NaN	NaN	1.22347	1.20968	1.18974	1.06997	1.07575	1.08234	1.08672	1.09905	1.15209	1.14315	1.1052	1.07954	1.01342	1.05055	1.09559	1.13978	1.14033	1.16608	1.16058	1.22974	1.20393	1.22115	1.29651	1.21327	1.27584	1.31051	1.39021	1.30185	NaN	NaN	NaN	NaN	NaN	NaN	NaN	NaN	NaN	NaN	NaN	NaN	NaN	NaN	NaN	NaN	NaN	NaN	NaN
30.5	NaN	NaN	1.0992	1.07846	1.03894	0.954606	0.98718	1.01746	1.03395	1.06639	1.0704	1.11785	1.07622	1.07949	1.04476	1.03321	1.02992	0.998663	1.04062	1.04604	1.07246	1.14933	1.19637	1.19744	1.17928	1.14909	1.18905	1.10509	1.23506	1.34567	NaN	NaN	NaN	NaN	NaN	NaN	NaN	NaN	NaN	NaN	NaN	NaN	NaN	NaN	NaN	NaN	NaN	NaN	NaN
29.5	NaN	NaN	1.04351	0.993386	0.984839	0.889727	0.950441	0.972362	1.00829	1.00798	1.12919	1.10485	1.0941	1.09417	1.05781	1.01776	1.03578	1.07643	1.01779	1.02805	0.944977	0.967625	1.19976	1.18832	1.09987	1.0574	1.09007	0.945099	1.09591	1.27625	NaN	NaN	NaN	NaN	NaN	NaN	NaN	NaN	NaN	NaN	NaN	NaN	NaN	NaN	NaN	NaN	NaN	NaN	NaN
28.5	NaN	NaN	1.00956	1.02738	1.00575	0.928822	0.908979	0.95616	0.977008	0.975385	1.07976	1.07065	1.04075	1.01513	0.989902	0.952729	0.989475	1.00332	0.970902	1.00658	1.10746	0.985297	1.31305	1.25783	1.15176	1.06897	0.885844	0.817053	0.751613	NaN	NaN	NaN	NaN	NaN	NaN	NaN	NaN	NaN	NaN	NaN	NaN	NaN	NaN	NaN	NaN	NaN	NaN	NaN	NaN
27.5	NaN	NaN	1.01032	1.0166	0.979882	0.943507	0.96547	0.968949	0.961755	0.952875	0.992705	0.956595	0.960873	0.924654	0.91648	0.861178	0.872233	0.955144	1.00784	0.976997	1.15128	1.04869	0.983353	0.96636	1.02032	1.07256	0.859759	0.860612	0.816171	NaN	NaN	NaN	NaN	NaN	NaN	NaN	NaN	NaN	NaN	NaN	NaN	NaN	NaN	NaN	NaN	NaN	NaN	NaN	NaN
26.5	NaN	NaN	1.0099	0.993667	0.950615	0.929663	0.996689	0.951489	0.964749	0.973456	0.987143	0.957725	0.893569	0.840369	0.878287	0.811569	0.816624	0.914508	0.943877	1.01004	1.09426	1.05328	0.961819	0.876655	0.803565	0.730211	0.869851	0.410719	NaN	NaN	NaN	NaN	NaN	NaN	NaN	NaN	NaN	NaN	NaN	NaN	NaN	NaN	NaN	NaN	NaN	NaN	NaN	NaN	NaN
25.5	NaN	NaN	1.03106	1.03144	0.980229	0.965637	0.977993	0.954802	0.931622	0.948053	0.953768	0.892062	0.831944	0.875721	0.886025	0.840032	0.933389	0.958753	0.977543	1.07124	1.09493	1.09844	1.04034	0.953523	0.751109	0.82375	0.647602	0.637919	NaN	NaN	NaN	NaN	NaN	NaN	NaN	NaN	NaN	NaN	NaN	NaN	NaN	NaN	NaN	NaN	NaN	NaN	NaN	NaN	NaN
24.5	NaN	NaN	1.00973	1.00764	0.982103	0.998303	0.962558	0.965261	0.905281	0.932939	0.871224	0.801845	0.820463	0.755222	0.807325	0.831089	0.895447	0.969186	0.897716	1.06412	1.1783	1.0956	1.07703	0.983606	0.827574	0.871043	0.72015	NaN	NaN	NaN	NaN	NaN	NaN	NaN	NaN	NaN	NaN	NaN	NaN	NaN	NaN	NaN	NaN	NaN	NaN	NaN	NaN	NaN	NaN
23.5	NaN	NaN	1.00024	0.977956	0.926542	0.953131	0.920355	0.904694	0.894509	0.859238	0.814543	0.755521	0.727706	0.720221	0.788685	0.718216	0.822635	0.870882	1.01619	0.999084	0.866056	1.18725	1.08222	1.01962	0.895215	0.758271	NaN	NaN	NaN	NaN	NaN	NaN	NaN	NaN	NaN	NaN	NaN	NaN	NaN	NaN	NaN	NaN	NaN	NaN	NaN	NaN	NaN	NaN	NaN
22.5	NaN	NaN	0.933291	0.961836	0.940804	0.936455	0.894312	0.864673	0.880982	0.763061	0.751623	0.731568	0.816436	0.796546	0.727758	0.794233	0.730132	0.630413	0.735817	0.8883	0.7047	NaN	NaN	NaN	NaN	NaN	NaN	NaN	NaN	NaN	NaN	NaN	NaN	NaN	NaN	NaN	NaN	NaN	NaN	NaN	NaN	NaN	NaN	NaN	NaN	NaN	NaN	NaN	NaN
21.5	NaN	NaN	0.941074	0.926985	0.911757	0.919513	0.912902	0.89535	0.821072	0.790149	0.701234	0.801493	0.804104	0.823469	0.837791	0.767462	0.784347	0.519913	0.989588	0.894429	NaN	NaN	NaN	NaN	NaN	NaN	NaN	NaN	NaN	NaN	NaN	NaN	NaN	NaN	NaN	NaN	NaN	NaN	NaN	NaN	NaN	NaN	NaN	NaN	NaN	NaN	NaN	NaN	NaN
20.5	NaN	NaN	0.925633	0.924011	0.917765	0.90181	0.841492	0.853377	0.900821	0.749851	0.754227	0.767234	0.822681	0.731022	0.728758	0.807048	0.778631	0.799769	0.834327	1.0167	NaN	NaN	NaN	NaN	NaN	NaN	NaN	NaN	NaN	NaN	NaN	NaN	NaN	NaN	NaN	NaN	NaN	NaN	NaN	NaN	NaN	NaN	NaN	NaN	NaN	NaN	NaN	NaN	NaN
19.5	NaN	NaN	0.890465	0.895006	0.910271	0.900437	0.855823	0.748751	0.785365	0.777925	0.753778	0.851773	0.890265	0.727337	0.775997	0.931097	0.930055	0.840085	NaN	NaN	NaN	NaN	NaN	NaN	NaN	NaN	NaN	NaN	NaN	NaN	NaN	NaN	NaN	NaN	NaN	NaN	NaN	NaN	NaN	NaN	NaN	NaN	NaN	NaN	NaN	NaN	NaN	NaN	NaN
18.5	NaN	NaN	0.912308	0.93742	0.91441	0.91723	0.847073	0.81745	0.834343	0.792663	0.888164	0.885654	0.721126	0.865384	0.929222	1.09214	1.06315	NaN	NaN	NaN	NaN	NaN	NaN	NaN	NaN	NaN	NaN	NaN	NaN	NaN	NaN	NaN	NaN	NaN	NaN	NaN	NaN	NaN	NaN	NaN	NaN	NaN	NaN	NaN	NaN	NaN	NaN	NaN	NaN
17.5	NaN	NaN	0.942602	0.903417	0.932508	0.900179	0.847661	0.775308	0.779169	0.809042	0.906516	0.854799	0.886005	0.915114	0.960061	1.12566	NaN	NaN	NaN	NaN	NaN	NaN	NaN	NaN	NaN	NaN	NaN	NaN	NaN	NaN	NaN	NaN	NaN	NaN	NaN	NaN	NaN	NaN	NaN	NaN	NaN	NaN	NaN	NaN	NaN	NaN	NaN	NaN	NaN
16.5	NaN	NaN	0.946988	0.89733	0.928444	0.954591	0.86909	0.808866	0.788995	0.835936	0.848917	1.00995	0.893796	0.907952	0.890561	1.0792	NaN	NaN	NaN	NaN	NaN	NaN	NaN	NaN	NaN	NaN	NaN	NaN	NaN	NaN	NaN	NaN	NaN	NaN	NaN	NaN	NaN	NaN	NaN	NaN	NaN	NaN	NaN	NaN	NaN	NaN	NaN	NaN	NaN
15.5	NaN	NaN	0.946374	0.923873	0.981252	0.971468	1.05039	1.00281	0.887557	0.94018	0.951683	1.08177	1.03807	1.08114	1.05992	1.14319	NaN	NaN	NaN	NaN	NaN	NaN	NaN	NaN	NaN	NaN	NaN	NaN	NaN	NaN	NaN	NaN	1.21172	1.15801	1.29938	1.34992	1.35623	1.41574	1.54166	1.53999	NaN	NaN	NaN	1.24498	1.26307	1.1237	1.06731	1.20946	1.20932
14.5	NaN	NaN	1.03031	0.942806	0.988954	1.0087	1.06174	0.956923	1.09833	1.07455	1.12834	1.15173	1.122	1.03759	1.07259	1.03074	0.957102	1.03806	1.0203	0.910151	0.995063	1.06294	0.919796	1.04078	1.01004	0.913677	0.863445	1.23661	1.26086	1.14643	1.23335	1.21841	1.18678	1.16117	1.31191	1.37049	1.42469	1.46322	1.43453	1.42105	1.38837	1.34162	1.15198	1.15513	1.23757	1.20623	1.16366	1.1189	1.23961
13.5	NaN	NaN	1.0658	1.00492	1.01437	0.98597	1.02701	1.05376	1.12163	1.11245	1.12323	1.12576	1.10143	1.07578	1.08728	1.09865	1.09632	1.20766	1.28168	1.32732	1.32671	1.34478	1.27206	1.14298	1.1063	1.06732	1.14609	1.14588	1.20293	1.2209	1.25471	1.24786	1.28373	1.35653	1.35594	1.33823	1.30291	1.33937	1.26606	1.28791	1.30299	1.31533	1.27894	1.26204	1.28771	1.31064	1.25842	1.20846	1.21173
12.5	NaN	NaN	1.0693	1.04902	0.99419	1.0007	0.938887	0.955231	1.05448	1.06652	1.09964	1.09037	1.08342	1.03861	1.04896	1.10514	1.10298	1.18064	1.23244	1.22236	1.21553	1.1498	1.13602	1.04921	0.980874	0.999365	1.11951	1.1213	1.1977	1.19084	1.19337	1.14239	1.15644	1.16768	1.20482	1.22321	1.15486	1.16432	1.22281	1.22794	1.21434	1.22639	1.18506	1.17871	1.19389	1.18345	1.1383	1.11893	1.07276
11.5	NaN	NaN	1.03841	1.00309	0.968104	0.926606	0.917461	0.987502	1.07591	1.09325	1.0842	1.05908	0.997396	0.95599	0.962887	1.01699	1.06152	1.07329	1.12907	1.12317	1.13781	1.11175	1.10032	1.07487	1.03851	1.04675	1.08501	1.12179	1.15453	1.20591	1.21045	1.18518	1.13292	1.12195	1.12949	1.18605	1.12837	1.14553	1.1594	1.1574	1.14682	1.15435	1.13233	1.11904	1.12887	1.09632	1.07375	1.08833	1.04212
10.5	NaN	NaN	1.03113	1.01551	0.952068	0.943975	0.940719	0.981824	1.03051	1.05759	1.06132	1.03662	0.995143	0.984296	0.958799	0.993647	1.01832	1.02733	1.04397	1.08105	1.09316	1.06796	1.06245	1.04978	0.979655	0.99403	1.04236	1.04429	1.05989	1.08409	1.09299	1.1019	1.10436	1.07863	1.09974	1.1099	1.09027	1.07732	1.08734	1.08667	1.07308	1.06837	1.03036	1.04378	1.0412	1.02127	1.02274	1.05629	1.03288
9.5	NaN	NaN	1.01141	0.986604	0.955558	0.926243	0.930058	0.947836	0.999354	1.01875	1.03979	1.02112	1.00304	0.980849	0.994763	1.00193	1.02254	1.02077	1.02901	1.0396	1.03225	0.972401	0.992131	0.988297	0.960353	0.953711	1.00025	0.99669	0.999365	1.01928	1.00807	1.01892	1.03003	1.04033	1.05949	1.10628	1.0605	1.05776	1.04429	1.03312	1.0337	1.02283	0.983188	1.00752	1.02937	1.00005	1.00575	1.03934	1.01677
8.5	NaN	NaN	1.02727	0.986679	0.947188	0.927449	0.920064	0.934972	0.967134	0.981023	1.01167	1.01012	0.984077	0.989886	0.978859	0.974341	0.963806	0.975722	0.978555	0.995042	1.00112	0.967734	0.995624	0.969362	0.910464	0.913547	0.950602	0.953041	0.939773	0.941862	0.95397	0.974108	0.973201	0.994807	1.01953	1.0504	1.01104	1.03365	1.00419	0.980159	0.974918	0.984632	0.950189	0.998149	1.01331	0.997977	0.988973	1.02089	1.0055
7.5	NaN	NaN	1.02759	0.982262	0.95174	0.939299	0.936896	0.944387	0.985043	0.987453	1.00758	1.01462	0.98661	0.986381	0.973641	0.966013	0.952663	0.954308	0.985032	0.992142	0.982791	0.972606	0.956794	0.937656	0.904749	0.90283	0.924577	0.910846	0.911784	0.910525	0.906297	0.937262	0.959218	1.00337	1.01967	1.04158	0.999275	1.00893	0.969303	0.957557	0.95071	0.954493	0.940143	0.980658	0.99322	0.990583	1.00369	1.04347	1.038
6.5	NaN	NaN	1.0035	0.941866	0.922221	0.929918	0.921357	0.926384	0.961473	0.957702	0.96324	0.973185	0.95907	0.967749	0.970095	0.948157	0.955004	0.966494	0.987197	0.999604	1.00225	0.974695	0.964005	0.934868	0.912026	0.889683	0.895123	0.890328	0.885792	0.877335	0.903935	0.914001	0.951976	0.994877	1.01763	1.04408	1.01508	1.00407	0.94196	0.9319	0.927781	0.932116	0.927058	0.975831	1.01632	1.00422	1.00394	1.04593	1.05489
5.5	NaN	NaN	0.988434	0.936805	0.928193	0.923685	0.913268	0.919118	0.957758	0.951978	0.962793	0.957024	0.928766	0.925468	0.936426	0.916255	0.946877	0.963995	0.988939	0.984693	0.972444	0.953086	0.973279	0.936981	0.925661	0.890444	0.911985	0.904409	0.887146	0.894179	0.905837	0.922032	0.940799	0.991307	1.02698	1.06621	1.04063	1.01482	0.96073	0.94177	0.968274	0.982889	1.00473	1.02892	1.07739	1.05816	1.05999	1.06401	1.11213
4.5	NaN	NaN	0.98646	0.93427	0.93069	0.937734	0.910382	0.916338	0.960309	0.948249	0.95431	0.952499	0.921192	0.932527	0.916834	0.913317	0.937696	0.962285	0.982358	0.997091	1.00304	0.995487	0.977669	0.962566	0.942591	0.909946	0.914413	0.904807	0.867872	0.912551	0.937642	0.927712	0.944525	1.00061	1.02179	1.06848	1.03632	1.01458	0.969377	0.98061	0.978352	0.999292	1.03806	1.02382	1.04381	1.07951	1.0459	1.06598	1.1818
3.5	NaN	NaN	0.981678	0.941804	0.932439	0.95153	0.938857	0.941406	0.963568	0.950943	0.952884	0.941689	0.931796	0.912862	0.93353	0.918686	0.979704	0.977695	1.01885	0.985818	0.996163	0.956261	0.944458	0.949721	0.932257	0.930215	0.971201	0.939459	0.916986	0.936808	0.942445	0.946271	0.993378	1.01645	1.02735	1.09418	1.10496	1.05865	1.00352	0.991657	1.01007	0.978801	1.07559	1.00299	1.03073	NaN	NaN	NaN	NaN
2.5	NaN	NaN	0.96705	0.928262	0.938415	0.950305	0.927056	0.937839	0.965954	0.945666	0.939675	0.907556	0.889582	0.879971	0.877743	0.867597	0.929373	0.988117	0.991484	0.995	0.983319	0.918441	0.957782	0.927744	0.895398	0.846941	0.90964	0.930012	1.03874	1.08122	1.04834	1.05262	1.00733	1.0283	0.96103	1.17722	1.18352	1.13664	1.16323	NaN	NaN	NaN	NaN	NaN	NaN	NaN	NaN	NaN	NaN
1.5	NaN	NaN	1.00559	0.948876	0.939927	0.951819	0.935059	0.912127	0.95071	0.906339	0.90315	0.880968	0.856735	0.882268	0.871074	0.873118	0.921219	0.911726	0.963591	0.982551	0.872748	0.93293	0.872308	0.800125	0.934708	NaN	NaN	NaN	NaN	NaN	NaN	NaN	NaN	NaN	NaN	NaN	NaN	NaN	NaN	NaN	NaN	NaN	NaN	NaN	NaN	NaN	NaN	NaN	NaN
0.5	NaN	NaN	0.909835	0.881789	0.908647	0.934419	0.914933	0.849269	0.862758	0.993403	0.951853	1.03388	0.945814	0.907284	0.931541	0.906505	0.856061	NaN	NaN	NaN	NaN	NaN	NaN	NaN	NaN	NaN	NaN	NaN	NaN	NaN	NaN	NaN	NaN	NaN	NaN	NaN	NaN	NaN	NaN	NaN	NaN	NaN	NaN	NaN	NaN	NaN	NaN	NaN	NaN
-0.5	NaN	NaN	0.840243	0.847035	0.816487	0.826432	0.9026	0.830722	0.956982	0.927842	0.969544	1.01814	0.954274	0.961293	NaN	NaN	NaN	NaN	NaN	NaN	NaN	NaN	NaN	NaN	NaN	NaN	NaN	NaN	NaN	NaN	NaN	NaN	NaN	NaN	NaN	NaN	NaN	NaN	NaN	NaN	NaN	NaN	NaN	NaN	NaN	NaN	NaN	NaN	NaN
-1.5	NaN	NaN	0.817365	0.840205	0.836608	0.838124	0.816251	0.759976	0.810484	0.855321	0.933212	0.981265	0.911825	0.961338	0.876574	NaN	NaN	NaN	NaN	NaN	NaN	NaN	NaN	NaN	NaN	NaN	NaN	NaN	NaN	NaN	NaN	NaN	NaN	NaN	NaN	NaN	NaN	NaN	NaN	NaN	NaN	NaN	NaN	NaN	NaN	NaN	NaN	NaN	NaN
-2.5	NaN	NaN	0.85302	0.852575	0.859379	0.828098	0.801148	0.797446	0.877063	0.816107	0.885234	0.95487	0.889496	0.89937	0.886531	0.868044	0.86315	0.823333	NaN	NaN	NaN	NaN	NaN	NaN	NaN	NaN	NaN	NaN	NaN	NaN	NaN	NaN	NaN	NaN	NaN	NaN	NaN	NaN	NaN	NaN	NaN	NaN	NaN	NaN	NaN	NaN	NaN	NaN	NaN
-3.5	NaN	NaN	0.869649	0.884293	0.882417	0.828475	0.807411	0.846365	0.910179	0.876485	0.907192	0.909628	0.841591	0.870014	0.815391	0.894678	0.834882	0.832513	0.818658	NaN	NaN	NaN	NaN	NaN	NaN	NaN	NaN	NaN	NaN	NaN	NaN	NaN	NaN	NaN	NaN	NaN	NaN	NaN	NaN	NaN	NaN	NaN	NaN	NaN	NaN	NaN	NaN	NaN	NaN
-4.5	NaN	NaN	0.887854	0.890617	0.886276	0.84092	0.827348	0.837015	0.871509	0.832597	0.862838	0.8247	0.811786	0.833041	0.839328	0.814198	0.82212	0.836186	0.829565	0.94661	1.0895	NaN	NaN	NaN	NaN	NaN	NaN	NaN	NaN	NaN	NaN	NaN	NaN	NaN	NaN	NaN	NaN	NaN	NaN	NaN	NaN	NaN	NaN	NaN	NaN	NaN	NaN	NaN	NaN
-5.5	NaN	NaN	0.923182	0.922867	0.905533	0.876405	0.857072	0.851988	0.856229	0.84235	0.844269	0.882348	0.857347	0.872745	0.87852	0.847383	0.819756	0.842147	0.835805	0.928464	0.995843	1.01143	1.01571	1.06283	NaN	NaN	NaN	NaN	NaN	NaN	NaN	NaN	NaN	NaN	NaN	NaN	NaN	NaN	NaN	NaN	NaN	NaN	NaN	NaN	NaN	NaN	NaN	NaN	NaN
-6.5	NaN	NaN	0.942513	0.925088	0.910695	0.886206	0.871075	0.871996	0.894286	0.874984	0.879213	0.899396	0.901049	0.913351	0.908676	0.898438	0.842205	0.881105	0.812406	0.880336	0.965576	0.93642	0.95266	0.946976	0.95848	0.931153	NaN	NaN	NaN	NaN	NaN	NaN	NaN	NaN	NaN	NaN	NaN	NaN	NaN	NaN	NaN	NaN	NaN	NaN	NaN	NaN	NaN	NaN	NaN
-7.5	NaN	NaN	0.974261	0.969183	0.940396	0.923429	0.904982	0.890827	0.884914	0.877938	0.902816	0.918108	0.926835	0.927301	0.930634	0.946917	0.940423	0.940996	0.947238	0.908292	0.986611	0.975951	0.973848	0.936179	0.921379	0.951332	0.896945	0.86218	NaN	NaN	NaN	NaN	NaN	NaN	NaN	NaN	NaN	NaN	NaN	NaN	NaN	NaN	NaN	NaN	NaN	NaN	NaN	NaN	NaN
-8.5	NaN	NaN	0.961728	0.959043	0.94126	0.912941	0.896247	0.88283	0.894815	0.896515	0.886554	0.925896	0.912759	0.929585	0.941776	0.944914	0.980582	0.999277	0.957455	0.954783	0.93781	0.930579	0.956355	0.970712	0.9586	0.925044	0.884495	0.881409	0.845598	0.815926	0.788834	NaN	NaN	NaN	NaN	NaN	NaN	NaN	NaN	NaN	NaN	NaN	NaN	NaN	NaN	NaN	NaN	NaN	NaN
-9.5	NaN	NaN	0.958025	0.969957	0.929766	0.895205	0.872829	0.872111	0.901438	0.922039	0.939383	0.901156	0.916503	0.909688	0.928727	0.934525	0.957883	0.956732	0.929337	0.899705	0.891403	0.888177	0.877797	0.85761	0.936164	0.96545	0.923952	0.930975	0.910842	0.913755	0.873242	NaN	NaN	NaN	NaN	NaN	NaN	NaN	NaN	NaN	NaN	NaN	NaN	NaN	NaN	NaN	NaN	NaN	NaN
-10.5	NaN	NaN	0.96205	0.939992	0.929612	0.905241	0.897662	0.887058	0.925553	0.951801	0.932936	0.906866	0.911295	0.908898	0.900168	0.915879	0.931464	0.927256	0.914075	0.847973	0.891557	0.874688	0.882253	0.843973	0.864017	0.889307	0.849713	0.853119	0.942053	0.9421	0.904369	0.920284	NaN	NaN	NaN	NaN	NaN	NaN	NaN	NaN	NaN	NaN	NaN	NaN	NaN	NaN	NaN	NaN	NaN
-11.5	NaN	NaN	0.942462	0.935379	0.919397	0.882451	0.881522	0.88778	0.880109	0.910902	0.910712	0.90259	0.866259	0.849095	0.882678	0.887139	0.913396	0.933742	0.935334	0.866525	0.848869	0.814729	0.826755	0.831862	0.85209	0.914211	0.832725	0.826406	0.855111	0.880862	0.897696	0.87949	NaN	NaN	NaN	NaN	NaN	NaN	NaN	NaN	NaN	NaN	NaN	NaN	NaN	NaN	NaN	NaN	NaN
-12.5	NaN	NaN	0.892838	0.927843	0.886738	0.871178	0.861901	0.881103	0.891281	0.903813	0.889495	0.883698	0.823408	0.820894	0.83344	0.834022	0.876232	0.886524	0.918483	0.859978	0.875402	0.894423	0.899042	0.839062	0.895341	0.951156	0.843734	0.878122	0.919148	0.889036	0.89863	NaN	NaN	NaN	NaN	NaN	NaN	NaN	NaN	NaN	NaN	NaN	NaN	NaN	NaN	NaN	NaN	NaN	NaN
-13.5	NaN	NaN	0.909511	0.908354	0.891828	0.879942	0.88001	0.896251	0.894815	0.901659	0.893983	0.860198	0.854962	0.813419	0.85404	0.865058	0.840455	0.918542	0.854967	0.813518	0.865	0.849016	0.841135	0.8386	0.887303	0.953342	0.983111	0.89703	NaN	NaN	NaN	NaN	NaN	NaN	NaN	NaN	NaN	NaN	NaN	NaN	NaN	NaN	NaN	NaN	NaN	NaN	NaN	NaN	NaN
-14.5	NaN	NaN	0.915164	0.945619	0.968777	0.944759	0.925619	0.922158	0.907042	0.905458	0.920703	0.929912	0.881273	0.885413	0.905649	0.879479	0.865045	0.924335	0.940499	0.913185	0.895553	0.891108	0.880349	0.852532	0.895285	0.933948	0.802839	NaN	NaN	NaN	NaN	NaN	NaN	NaN	NaN	NaN	NaN	NaN	NaN	NaN	NaN	NaN	NaN	NaN	NaN	NaN	NaN	NaN	NaN
-15.5	NaN	NaN	0.921992	0.964206	1.03204	1.00143	0.970292	0.98665	0.939502	0.933831	0.949729	0.991905	0.93987	0.920284	0.937393	0.90612	0.920914	0.967952	0.985526	0.980247	0.998342	1.0017	0.957014	0.890709	0.866686	0.980546	0.869056	NaN	NaN	NaN	NaN	NaN	NaN	NaN	NaN	NaN	NaN	NaN	NaN	NaN	NaN	NaN	NaN	NaN	NaN	NaN	NaN	NaN	NaN
-16.5	NaN	NaN	0.922172	0.983256	1.06873	1.10219	1.13321	1.09898	1.03268	1.01476	1.03718	1.10783	1.07809	0.995441	1.02198	1.00332	1.00166	0.973938	1.0399	0.951018	1.07411	1.11069	1.07512	0.958317	0.929373	1.08242	NaN	NaN	NaN	NaN	NaN	NaN	NaN	NaN	NaN	NaN	0.875742	0.861849	0.860806	0.832788	0.771245	0.778862	0.780384	0.816821	NaN	NaN	NaN	NaN	NaN
-17.5	NaN	NaN	1.00879	1.09855	1.18979	1.22696	1.23888	1.20886	1.20907	1.16902	1.24996	1.22743	1.1315	1.14525	1.13921	1.07943	1.01893	1.03346	0.984434	0.945756	1.04539	1.16069	1.16731	1.31327	1.0899	1.25265	0.808942	NaN	NaN	NaN	NaN	NaN	NaN	NaN	NaN	1.13964	1.03841	0.923371	0.946844	0.895974	0.819146	0.850798	0.850883	0.867898	0.939252	0.980466	0.997001	NaN	NaN
-18.5	NaN	NaN	1.04713	1.17347	1.27297	1.32971	1.34914	1.33476	1.31137	1.26151	1.2445	1.25338	1.21001	1.23355	1.19547	1.12674	1.07199	1.0541	1.1604	1.20752	1.23086	1.2655	1.1813	1.23738	1.17979	1.07954	1.00064	0.85973	NaN	NaN	NaN	NaN	NaN	NaN	1.12403	1.17717	1.04296	0.967784	0.981343	0.954753	0.86027	0.885703	0.890675	0.928388	0.931591	0.962387	1.0282	1.06423	1.09998
-19.5	NaN	NaN	1.07152	1.18949	1.2558	1.35801	1.32755	1.33872	1.34689	1.29038	1.31592	1.25296	1.19395	1.20968	1.12789	1.12109	1.08889	1.14038	1.21581	1.20154	1.25316	1.27332	1.27975	1.20105	1.13595	1.10055	1.07093	1.04663	1.20132	NaN	NaN	NaN	1.21708	1.19574	1.22516	1.20399	1.13555	1.11514	1.14237	1.04502	0.920873	0.968121	0.982373	0.994497	1.00776	0.971392	1.04267	1.08646	1.09298
-20.5	NaN	NaN	1.09811	1.14154	1.21014	1.32379	1.32716	1.32651	1.29207	1.28594	1.30895	1.33589	1.24253	1.28046	1.22768	1.17497	1.20398	1.2788	1.26838	1.25132	1.32965	1.29838	1.21724	1.24077	1.17431	1.21018	1.13957	1.15166	1.14462	1.13774	1.20776	1.29251	1.19011	1.16195	1.19382	1.16185	1.10823	1.14482	1.15301	1.17051	1.13018	1.08368	1.08328	1.05442	1.03109	1.01755	1.06486	1.08232	1.11852
-21.5	NaN	NaN	1.15916	1.1419	1.1996	1.27833	1.32067	1.35123	1.24854	1.21407	1.26443	1.28591	1.26185	1.32352	1.29116	1.23145	1.30081	1.37266	1.36296	1.34974	1.37133	1.27992	1.25729	1.18435	1.21663	1.18318	1.16901	1.16887	1.22958	1.25661	1.28962	1.29763	1.23557	1.19341	1.18226	1.18146	1.12359	1.14798	1.14835	1.13666	1.1469	1.11197	1.10112	1.09893	1.11262	1.10829	1.09924	1.11861	1.1393
-22.5	NaN	NaN	1.11479	1.08499	1.12004	1.23385	1.22262	1.29698	1.26042	1.21659	1.24286	1.27536	1.22923	1.26397	1.30336	1.30473	1.30268	1.39082	1.39571	1.32542	1.29503	1.25045	1.26558	1.20204	1.20048	1.19899	1.22523	1.22294	1.26859	1.31663	1.29564	1.32637	1.24932	1.23797	1.25602	1.21747	1.15711	1.16053	1.16192	1.18178	1.20671	1.16624	1.18184	1.16026	1.15173	1.14855	1.17317	1.14268	1.17514
-23.5	NaN	NaN	1.12147	1.10614	1.13838	1.17331	1.19548	1.15362	1.12398	1.14116	1.21741	1.25306	1.21111	1.25848	1.34883	1.32993	1.30644	1.37351	1.42294	1.3592	1.39043	1.35554	1.32335	1.27073	1.26705	1.27607	1.26334	1.28138	1.30954	1.35721	1.33088	1.31046	1.27221	1.21665	1.24402	1.2106	1.15005	1.16784	1.14424	1.1606	1.1895	1.20825	1.21175	1.21425	1.19492	1.18125	1.16795	1.1646	1.19564
-24.5	NaN	NaN	1.1664	1.14839	1.10566	1.1611	1.15884	1.14801	1.13876	1.14947	1.19139	1.23593	1.21658	1.29417	1.37665	1.36726	1.35725	1.42059	1.47206	1.44979	1.48996	1.46923	1.37146	1.30749	1.36653	1.32993	1.33905	1.30171	1.32371	1.3417	1.30225	1.28099	1.26726	1.26047	1.23899	1.21303	1.20715	1.23751	1.21954	1.19577	1.22767	1.27159	1.2446	1.21582	1.19705	1.17896	1.18075	1.17742	1.19314
-25.5	NaN	NaN	1.1984	1.20315	1.11441	1.12686	1.09888	1.10509	1.05499	1.1274	1.20797	1.22431	1.21717	1.2757	1.32725	1.36129	1.34256	1.44542	1.50569	1.48693	1.49869	1.42401	1.42463	1.37816	1.36919	1.34308	1.3247	1.29425	1.27547	1.2771	1.26156	1.24933	1.26684	1.24739	1.2081	1.21972	1.23545	1.2314	1.22453	1.24448	1.28564	1.31948	1.30734	1.29701	1.20968	1.1905	1.1851	1.21915	1.25576
-26.5	NaN	NaN	1.24043	1.2069	1.15821	1.12506	1.10937	1.08637	1.11293	1.14972	1.21534	1.26198	1.31279	1.33559	1.38591	1.37891	1.39426	1.44919	1.53109	1.50229	1.5566	1.52224	1.48152	1.53087	1.47079	1.38917	1.40903	1.36516	1.27729	1.25851	1.28439	1.25832	1.30504	1.29598	1.26693	1.26477	1.24708	1.23758	1.24164	1.27373	1.33061	1.37037	1.36406	1.3646	1.23712	1.19411	1.20427	1.2336	1.29598
-27.5	NaN	NaN	1.19587	1.21346	1.17165	1.13132	1.16145	1.1332	1.15243	1.22676	1.23363	1.27103	1.27158	1.31881	1.36512	1.39234	1.4136	1.47955	1.49977	1.50653	1.56924	1.57353	1.54618	1.56102	1.56013	1.39727	1.35534	1.32066	1.25333	1.2617	1.26509	1.27318	1.34085	1.33487	1.30983	1.29618	1.27482	1.27435	1.26915	1.28696	1.32394	1.35904	1.35377	1.34959	1.29822	1.27044	1.25186	1.28102	1.3176
-28.5	NaN	NaN	1.20754	1.25181	1.23071	1.21603	1.18758	1.2041	1.2787	1.2708	1.28482	1.26167	1.25896	1.27436	1.33609	1.36889	1.40914	1.45749	1.46598	1.52708	1.56051	1.5645	1.56537	1.58909	1.50511	1.40027	1.34919	1.32186	1.26538	1.27577	1.35579	1.35807	1.40292	1.41144	1.39407	1.35758	1.32002	1.30208	1.28863	1.29404	1.34807	1.36336	1.35732	1.3772	1.33199	1.30954	1.30586	1.30507	1.33702
-29.5	NaN	NaN	1.1543	1.16678	1.18419	1.22395	1.23635	1.17359	1.23281	1.18218	1.2208	1.20246	1.23445	1.27704	1.3211	1.36087	1.42518	1.46683	1.47483	1.49362	1.51078	1.52162	1.5457	1.56242	1.48644	1.38008	1.32478	1.2945	1.2775	1.30958	1.37719	1.41371	1.45426	1.45211	1.46472	1.39287	1.31866	1.27551	1.24512	1.25524	1.25917	1.2712	1.29746	1.32769	1.31756	1.33857	1.33485	1.32649	1.35324
-30.5	NaN	NaN	1.13682	1.17162	1.15869	1.25558	1.25206	1.26067	1.27658	1.22379	1.161	1.10846	1.25229	1.26132	1.3416	1.38625	1.38891	1.46308	1.44285	1.44797	1.51382	1.50089	1.48169	1.54616	1.43721	1.36537	1.30245	1.30608	1.31328	1.33124	1.39239	1.44999	1.41523	1.42954	1.46544	1.39002	1.31444	1.24382	1.20719	1.19752	1.26646	1.25099	1.27759	1.3205	1.30819	1.29369	1.30516	1.31373	1.32321
-31.5	NaN	NaN	1.03332	1.08773	1.2071	1.23991	1.17387	1.21936	1.21877	1.15309	1.10904	1.14272	1.17537	1.1979	1.27572	1.29296	1.33037	1.365	1.3345	1.41321	1.46167	1.51424	1.47005	1.48622	1.45319	1.37438	1.31238	1.27212	1.28547	1.30387	1.36901	1.37165	1.40092	1.37586	1.3716	1.31073	1.27918	1.2255	1.209	1.21964	1.23186	1.21266	1.27199	1.26731	1.26233	1.27141	1.29219	1.31371	1.35263
-32.5	NaN	NaN	1.12812	1.12538	1.15722	1.19009	1.1726	1.2178	1.12727	1.1494	1.08803	1.05153	1.17071	1.20997	1.16498	1.24392	1.23359	1.14603	1.3041	1.36968	1.38582	1.41799	1.44196	1.40304	1.36212	1.35563	1.30443	1.28364	1.31103	1.32258	1.35305	1.36229	1.27113	1.2857	1.25851	1.24022	1.20226	1.13052	1.17496	1.19933	1.22688	1.20371	1.24362	1.28494	1.26926	1.25786	1.26558	1.28757	1.27347
-33.5	NaN	NaN	1.06991	1.1203	1.05938	1.10764	1.15163	1.12925	1.12734	1.12034	1.07204	1.02113	1.13623	1.15942	1.20967	1.26072	1.16164	1.21926	1.21817	1.25999	1.33078	1.35006	1.34424	1.32285	1.308	1.31681	1.25442	1.26664	1.27125	1.31659	1.34428	1.31376	1.34164	1.2946	1.25971	1.14762	1.09294	1.08783	1.06992	1.16678	1.18555	1.18456	1.19692	1.23996	1.20583	1.22983	1.17862	1.21552	1.16812
-34.5	NaN	NaN	1.04178	0.984649	1.03485	1.06081	1.07602	1.14633	1.11702	1.08337	1.04074	1.10164	1.09359	1.13378	1.19834	1.1453	1.12895	1.13971	1.05596	1.18284	1.25014	1.21185	1.19999	1.26008	1.28249	1.3148	1.27311	1.27708	1.24675	1.25951	1.277	1.224	1.27596	1.23771	1.15368	1.17997	1.07316	1.09875	1.09812	1.18008	1.06867	1.20452	1.19705	1.16231	1.21733	1.15149	1.19322	1.19974	1.13734
-35.5	NaN	NaN	1.05038	1.0809	1.1074	1.12281	1.1186	1.07267	1.1014	1.0887	1.02728	0.988615	0.989723	1.09611	1.16353	1.09057	1.12601	1.14109	1.14165	1.16665	1.13089	1.18548	1.25441	1.14195	1.32112	1.27265	1.32751	1.28667	1.20378	1.26253	1.22136	1.17576	1.16099	1.1819	1.14651	1.16205	1.13448	1.02548	1.10851	1.17273	1.14803	1.2224	1.2129	1.14369	1.06586	1.14428	1.09844	1.13194	1.1422
-36.5	NaN	NaN	1.06963	0.989343	0.990834	1.08338	1.05045	1.07549	1.13849	1.11202	1.04416	0.99401	0.999104	1.11409	1.06656	1.06864	1.04769	1.0422	1.16283	1.05519	1.07727	1.13117	1.13073	1.18414	1.22303	1.17991	1.23301	1.31585	1.21092	1.15982	1.28176	1.19141	1.19148	1.19985	1.17392	1.11815	1.0878	1.06122	1.09994	1.17031	1.2043	1.23265	1.23568	1.15059	1.12041	1.0889	1.05533	1.0014	1.09589
-37.5	NaN	NaN	1.00813	0.981702	1.00858	0.94196	0.91072	0.961667	1.06235	1.06723	0.956832	1.04313	1.07047	1.07367	1.09783	1.12459	1.18662	1.17729	1.22544	1.13249	1.13747	1.1498	1.20296	1.1605	1.19312	1.22146	1.2226	1.12647	1.21132	1.24251	1.23008	1.15292	1.17339	1.16984	1.13885	1.15825	1.0673	1.08456	1.06885	1.06741	1.05772	1.1922	1.08039	1.0689	1.09217	1.01803	0.974439	0.975363	1.00699
-38.5	NaN	NaN	0.957081	0.893882	0.916042	0.906957	0.88205	0.920868	0.93066	0.981021	0.995865	0.93936	1.10731	0.988281	1.13776	1.13807	1.19004	1.27443	1.20195	1.13732	1.2057	1.29075	1.24893	1.15722	1.19488	1.15397	1.15372	1.10064	1.06611	1.06436	1.02737	1.06892	1.06118	1.10663	1.05232	1.15099	1.00955	1.04208	0.972789	1.0672	1.08124	1.17205	1.08851	1.04548	1.06582	1.0573	1.07748	1.09833	1.05653
-39.5	NaN	NaN	0.986343	0.915866	0.84426	0.938612	0.913267	0.92706	0.964986	1.04026	1.05973	1.0086	1.0625	0.940198	1.00987	1.10757	1.15931	1.07897	1.27462	1.26564	1.21761	1.2762	1.33367	1.25448	1.20836	1.0575	1.06281	1.04147	1.09199	1.08392	0.956922	0.973247	1.04156	1.04176	1.03588	1.05386	1.02641	1.10036	1.07217	1.06429	1.1407	1.0486	0.996149	1.1588	1.09617	1.10489	1.12593	1.05074	1.07223
-40.5	NaN	NaN	0.941355	0.907712	0.862905	0.834981	0.862857	0.948308	0.986337	1.07655	1.09849	1.04352	1.05526	0.95278	0.976828	1.00769	1.09989	1.26858	1.29111	1.27415	1.38213	1.34346	1.26544	1.31596	1.24784	1.21231	1.14348	1.08734	1.00312	1.02536	0.946295	0.964954	0.955294	0.978423	0.982809	0.979952	1.02064	0.999035	1.04227	1.01942	0.999518	0.971975	1.02062	1.11904	1.13398	1.12719	1.17435	1.17341	1.03069
-41.5	NaN	NaN	0.864443	0.983832	0.983507	0.936963	0.9579	1.02468	1.02171	0.934944	1.01887	1.03044	0.937935	1.09311	1.04532	1.12741	1.1624	1.28399	1.32578	1.33815	1.36397	1.37236	1.30159	1.32506	1.232	1.11583	1.09798	0.980843	1.02363	1.03525	0.963049	0.886033	0.850264	1.00453	0.943296	0.995515	1.00321	1.08415	0.972107	0.938969	0.890698	0.961613	0.961901	1.08078	1.18445	1.19929	1.24795	1.23439	1.11998
-42.5	NaN	NaN	0.835566	0.983821	1.04939	1.07504	0.884477	0.94193	0.930949	0.99598	0.956761	1.0176	0.982025	1.05133	1.0933	1.15713	1.18448	1.24535	1.22884	1.27599	1.37516	1.24807	1.26972	1.35013	1.23016	1.15867	1.16295	1.00167	1.01267	1.01852	0.888112	0.921042	0.948676	0.980963	0.871283	0.936166	1.0218	1.0781	0.956255	1.05436	1.05124	0.942394	1.00524	1.07609	1.16534	1.14443	1.243	1.28939	1.20134
-43.5	NaN	NaN	0.849091	1.0201	1.05299	0.99932	0.973211	1.00994	1.02283	1.04564	1.01865	0.999425	1.00021	1.05917	1.06122	1.0957	1.0884	1.11882	1.16937	1.30681	1.39405	1.34808	1.28744	1.33993	1.15252	1.09513	1.02202	0.998804	0.986843	1.00992	0.961451	0.907872	0.944262	0.927549	0.895036	0.950234	1.01743	1.0555	0.98404	0.954181	0.969743	0.979811	0.945196	1.0252	1.10834	1.16759	1.26061	1.20033	1.2061
-44.5	NaN	NaN	0.82991	0.994268	0.925758	0.913741	0.960396	0.994685	1.01487	1.0039	0.938003	1.02462	1.03945	1.02971	1.08046	1.09408	1.11541	1.13766	1.18537	1.27367	1.37608	1.36837	1.36292	1.29943	1.16772	0.98982	1.0851	1.01438	0.998662	1.13319	1.0884	1.01229	0.980296	0.985522	0.866768	0.919766	0.973268	1.01179	1.04196	0.990127	1.08218	0.969697	0.951129	1.05366	1.17327	1.16754	1.25254	1.18874	1.16668
-45.5	NaN	NaN	0.857315	0.953327	1.01371	1.00764	0.995412	1.02975	0.997511	1.01046	0.96052	0.956377	1.04293	1.08947	1.09642	1.09836	1.11939	1.12622	1.11599	1.22656	1.21587	1.22703	1.14378	1.21232	1.1772	1.11007	0.924852	1.0391	1.06988	1.09524	1.09075	1.05679	1.01129	0.990698	0.893066	0.911162	0.955231	0.967345	0.995663	0.966538	1.05248	0.952695	1.06731	1.04738	1.08472	1.08079	1.09147	1.07689	1.04014
-46.5	NaN	NaN	0.806992	0.877323	0.891734	0.884757	0.920838	0.894603	0.918185	0.861922	0.908536	0.933757	1.00214	1.05062	1.04906	1.04828	1.10318	1.12344	1.219	1.20003	1.20948	1.13375	1.01419	1.15514	1.05597	1.08978	1.005	0.976624	1.06185	1.09044	1.0211	1.03768	1.04756	1.063	0.938652	0.938594	0.913725	0.881257	0.902997	0.900051	0.995689	0.892383	0.909024	1.00618	0.990712	1.05305	1.02711	1.02062	0.999799
-47.5	NaN	NaN	0.820344	0.922871	0.931706	0.881614	0.823381	0.905584	0.893078	0.933835	0.869261	0.934944	0.892948	1.04337	1.07139	1.02367	1.12562	1.16398	1.23549	1.27766	1.37141	1.26098	1.16514	1.13752	1.21355	1.07928	1.06149	0.975857	1.02286	1.07597	1.04418	1.09152	1.07535	1.08384	0.9245	0.960061	0.922004	0.865493	0.843076	0.817563	0.852145	0.789433	0.862287	0.950133	0.995483	0.983908	1.06501	1.02746	1.00093
-48.5	NaN	NaN	NaN	NaN	NaN	NaN	NaN	NaN	NaN	NaN	NaN	NaN	NaN	NaN	NaN	NaN	NaN	NaN	NaN	NaN	NaN	NaN	NaN	NaN	NaN	NaN	NaN	NaN	NaN	NaN	NaN	NaN	NaN	NaN	NaN	NaN	NaN	NaN	NaN	NaN	NaN	NaN	NaN	NaN	NaN	NaN	NaN	NaN	NaN
-49.5	NaN	NaN	NaN	NaN	NaN	NaN	NaN	NaN	NaN	NaN	NaN	NaN	NaN	NaN	NaN	NaN	NaN	NaN	NaN	NaN	NaN	NaN	NaN	NaN	NaN	NaN	NaN	NaN	NaN	NaN	NaN	NaN	NaN	NaN	NaN	NaN	NaN	NaN	NaN	NaN	NaN	NaN	NaN	NaN	NaN	NaN	NaN	NaN	NaN
NaN	-179.5	-178.5	-177.5	-176.5	-175.5	-174.5	-173.5	-172.5	-171.5	-170.5	-169.5	-168.5	-167.5	-166.5	-165.5	-164.5	-163.5	-162.5	-161.5	-160.5	-159.5	-158.5	-157.5	-156.5	-155.5	-154.5	-153.5	-152.5	-151.5	-150.5	-149.5	-148.5	-147.5	-146.5	-145.5	-144.5	-143.5	-142.5	-141.5	-140.5	-139.5	-138.5	-137.5	-136.5	-135.5	-134.5	-133.5	-132.5	-131.5
[truncated: 311 more columns]

## Sheet: r2
49.5	NaN	NaN	NaN	NaN	NaN	NaN	NaN	NaN	NaN	NaN	NaN	NaN	NaN	NaN	NaN	NaN	NaN	NaN	NaN	NaN	NaN	NaN	NaN	NaN	NaN	NaN	NaN	NaN	NaN	NaN	NaN	NaN	NaN	NaN	NaN	NaN	NaN	NaN	NaN	NaN	NaN	NaN	NaN	NaN	NaN	NaN	NaN	NaN	NaN
48.5	NaN	NaN	NaN	NaN	NaN	NaN	NaN	NaN	NaN	NaN	NaN	NaN	NaN	NaN	NaN	NaN	NaN	NaN	NaN	NaN	NaN	NaN	NaN	NaN	NaN	NaN	NaN	NaN	NaN	NaN	NaN	NaN	NaN	NaN	NaN	NaN	NaN	NaN	NaN	NaN	NaN	NaN	NaN	NaN	NaN	NaN	NaN	NaN	NaN
47.5	NaN	NaN	0.79672	0.787278	0.780756	0.75531	0.735367	0.739752	0.8078	0.803129	0.800296	0.829244	0.857185	0.868174	0.857652	0.8817	0.889397	0.894327	0.890986	0.879147	0.878197	0.851701	0.844771	0.820237	0.798223	0.825279	0.762432	0.816197	0.825889	0.80492	0.768212	0.806961	0.826202	0.793675	0.792991	0.775184	0.746898	0.784943	0.745185	0.729242	0.661905	0.728524	0.740627	0.764411	0.789376	0.780841	0.768019	0.821025	0.78535
46.5	NaN	NaN	0.812485	0.813673	0.803216	0.762516	0.730331	0.739974	0.781898	0.778724	0.791215	0.834615	0.856148	0.865313	0.879367	0.888603	0.896583	0.890974	0.896571	0.88672	0.882262	0.846144	0.848315	0.82915	0.842019	0.83508	0.827977	0.816093	0.847275	0.818687	0.822768	0.828598	0.817318	0.811678	0.811234	0.80605	0.75593	0.769451	0.76321	0.728045	0.65204	0.750092	0.654402	0.661872	0.707699	0.732439	0.789002	0.814042	0.80063
45.5	NaN	NaN	0.837603	0.865393	0.851872	0.833362	0.776735	0.771792	0.777047	0.787164	0.790962	0.814438	0.832466	0.850995	0.858313	0.879214	0.888746	0.891462	0.882599	0.87739	0.852676	0.883207	0.845549	0.829995	0.848468	0.840053	0.845351	0.837508	0.860467	0.824222	0.810373	0.806336	0.820705	0.776301	0.812468	0.830777	0.792498	0.803356	0.735551	0.697678	0.638869	0.613317	0.5537	0.651532	0.64462	0.735421	0.75569	0.78389	0.842276
44.5	NaN	NaN	0.830088	0.848199	0.845575	0.846211	0.805779	0.813864	0.810014	0.805791	0.796496	0.801063	0.807916	0.835087	0.82988	0.871675	0.83445	0.834221	0.848644	0.851274	0.858738	0.873123	0.845395	0.851051	0.827275	0.855087	0.87537	0.861449	0.8722	0.880284	0.848116	0.860313	0.887571	0.848612	0.832228	0.848418	0.845248	0.819119	0.76063	0.725747	0.63789	0.62961	0.606208	0.55023	0.663267	0.72798	0.746487	0.791496	0.810164
43.5	NaN	NaN	0.814537	0.841478	0.83242	0.843839	0.826166	0.816018	0.817792	0.824392	0.811177	0.828827	0.819519	0.799703	0.806903	0.819261	0.823922	0.836412	0.822548	0.835499	0.851085	0.872188	0.866052	0.868062	0.863108	0.871279	0.874291	0.87652	0.870408	0.857961	0.843153	0.86389	0.859222	0.839129	0.854544	0.827798	0.837462	0.821205	0.826529	0.729863	0.693509	0.602432	0.601212	0.548818	0.589108	0.719052	0.77447	0.777901	0.779643
42.5	NaN	NaN	0.817719	0.811952	0.813295	0.829905	0.848414	0.855073	0.829525	0.819345	0.796154	0.79408	0.809253	0.797023	0.785794	0.827145	0.812095	0.813103	0.831564	0.849789	0.843549	0.892064	0.888405	0.886712	0.862875	0.872423	0.873166	0.856464	0.861915	0.849174	0.820994	0.825166	0.85191	0.838781	0.820365	0.845109	0.824844	0.83064	0.78053	0.769461	0.631716	0.566034	0.490624	0.513487	0.585303	0.654017	0.741019	0.667052	0.684481
41.5	NaN	NaN	0.822467	0.821156	0.825786	0.828643	0.840219	0.831804	0.867254	0.828168	0.841079	0.824779	0.787396	0.803461	0.77891	0.804517	0.823123	0.842386	0.793136	0.852526	0.868849	0.878022	0.876365	0.872077	0.842224	0.856846	0.848179	0.797491	0.832723	0.846259	0.832249	0.792443	0.824302	0.830674	0.816258	0.848548	0.843162	0.820579	0.807972	0.713374	0.666367	0.576723	0.653751	NaN	NaN	NaN	0.713074	0.65448	0.749289
40.5	NaN	NaN	0.841493	0.812529	0.825895	0.842452	0.818338	0.829681	0.84879	0.842427	0.816371	0.822532	0.818614	0.782406	0.75307	0.805886	0.798737	0.796567	0.790493	0.829571	0.850527	0.831421	0.850788	0.844901	0.793685	0.778615	0.813899	0.799464	0.795026	0.826994	0.794448	0.801146	0.823072	0.818591	0.85394	0.835522	0.823484	0.82963	0.812343	0.64433	0.671691	0.618473	NaN	NaN	NaN	NaN	NaN	0.710978	0.717737
39.5	NaN	NaN	0.829088	0.820562	0.835088	0.833728	0.808208	0.799183	0.838094	0.82787	0.839199	0.828404	0.817641	0.802859	0.80374	0.839398	0.873672	0.855619	0.856686	0.863571	0.829834	0.818227	0.815329	0.828889	0.765388	0.768583	0.795228	0.791724	0.775773	0.775914	0.728592	0.749431	0.784311	0.777375	0.788311	0.783397	0.79663	0.683053	0.701713	0.665505	0.595729	NaN	NaN	NaN	NaN	NaN	NaN	NaN	NaN
38.5	NaN	NaN	0.833947	0.844843	0.821648	0.824295	0.83143	0.827536	0.847028	0.842399	0.825324	0.832281	0.804876	0.806167	0.801275	0.818836	0.819075	0.887019	0.864768	0.858176	0.847812	0.822914	0.797981	0.848831	0.800144	0.759787	0.760189	0.735644	0.711342	0.740411	0.697419	0.684914	0.744241	0.740812	0.806292	0.872629	0.81791	NaN	NaN	NaN	NaN	NaN	NaN	NaN	NaN	NaN	NaN	NaN	NaN
37.5	NaN	NaN	0.883472	0.868333	0.843739	0.826531	0.809594	0.831125	0.865758	0.844812	0.822726	0.835689	0.845555	0.833614	0.796377	0.833786	0.820753	0.848324	0.855892	0.841153	0.859878	0.773103	0.724429	0.799976	0.748097	0.760965	0.734805	0.663344	0.683011	0.740881	0.748146	0.771995	0.716936	0.74101	0.760057	NaN	NaN	NaN	NaN	NaN	NaN	NaN	NaN	NaN	NaN	NaN	NaN	NaN	NaN
36.5	NaN	NaN	0.871007	0.842492	0.866657	0.844604	0.811542	0.853004	0.829054	0.84574	0.854968	0.854631	0.826587	0.815211	0.771186	0.823284	0.797542	0.818176	0.848895	0.819599	0.823473	0.744706	0.755068	0.775513	0.677466	0.777398	0.75385	0.80461	0.809596	0.75118	0.732236	0.807026	0.791582	NaN	NaN	NaN	NaN	NaN	NaN	NaN	NaN	NaN	NaN	NaN	NaN	NaN	NaN	NaN	NaN
35.5	NaN	NaN	0.861126	0.837718	0.865251	0.856484	0.839574	0.850106	0.851215	0.859006	0.855584	0.841214	0.823293	0.779689	0.821121	0.857508	0.823623	0.861312	0.811833	0.828476	0.803486	0.818003	0.819502	0.751914	0.753382	0.761788	0.883026	0.889076	0.824943	0.807261	0.827179	0.737031	0.726043	NaN	NaN	NaN	NaN	NaN	NaN	NaN	NaN	NaN	NaN	NaN	NaN	NaN	NaN	NaN	NaN
34.5	NaN	NaN	0.858711	0.852537	0.875984	0.863322	0.81753	0.832809	0.860664	0.824232	0.819129	0.791327	0.780894	0.798551	0.756447	0.80737	0.802221	0.813213	0.725481	0.755157	0.788279	0.783443	0.772416	0.842725	0.839529	0.873385	0.887001	0.877623	0.8958	0.809117	0.789797	0.643397	NaN	NaN	NaN	NaN	NaN	NaN	NaN	NaN	NaN	NaN	NaN	NaN	NaN	NaN	NaN	NaN	NaN
33.5	NaN	NaN	0.85868	0.864863	0.8737	0.828435	0.782426	0.797752	0.782792	0.774581	0.822296	0.774317	0.761996	0.77232	0.768534	0.710627	0.82102	0.772136	0.79319	0.788773	0.742518	0.705588	0.681109	0.710874	0.763967	0.773895	0.808764	0.877987	0.83704	0.866773	0.801967	0.730565	NaN	NaN	NaN	NaN	NaN	NaN	NaN	NaN	NaN	NaN	NaN	NaN	NaN	NaN	NaN	NaN	NaN
32.5	NaN	NaN	0.853775	0.862676	0.872813	0.810592	0.777858	0.766712	0.756405	0.796789	0.815395	0.813529	0.761414	0.729947	0.672973	0.670236	0.720055	0.733016	0.72505	0.767263	0.769984	0.730964	0.678188	0.708802	0.768481	0.741208	0.798867	0.760359	0.814238	0.812219	0.81667	NaN	NaN	NaN	NaN	NaN	NaN	NaN	NaN	NaN	NaN	NaN	NaN	NaN	NaN	NaN	NaN	NaN	NaN
31.5	NaN	NaN	0.873342	0.855016	0.844796	0.771843	0.774972	0.782664	0.76844	0.75081	0.806611	0.763454	0.774878	0.718825	0.672031	0.650237	0.698062	0.705833	0.68752	0.759422	0.718007	0.732666	0.677032	0.719017	0.726203	0.730762	0.812355	0.783997	0.802136	0.695146	NaN	NaN	NaN	NaN	NaN	NaN	NaN	NaN	NaN	NaN	NaN	NaN	NaN	NaN	NaN	NaN	NaN	NaN	NaN
30.5	NaN	NaN	0.838215	0.794607	0.80183	0.77005	0.72439	0.76599	0.772837	0.790053	0.772214	0.788015	0.767276	0.777467	0.693489	0.659985	0.721098	0.55904	0.599087	0.583321	0.668888	0.721987	0.695155	0.753236	0.644132	0.698215	0.678199	0.492934	0.46401	0.730765	NaN	NaN	NaN	NaN	NaN	NaN	NaN	NaN	NaN	NaN	NaN	NaN	NaN	NaN	NaN	NaN	NaN	NaN	NaN
29.5	NaN	NaN	0.857377	0.796377	0.81485	0.743734	0.79463	0.790774	0.801175	0.766863	0.842926	0.81298	0.795646	0.779741	0.741471	0.687329	0.698327	0.725803	0.679264	0.708519	0.506806	0.524752	0.707514	0.70702	0.639756	0.511991	0.640333	0.429805	0.36341	0.649997	NaN	NaN	NaN	NaN	NaN	NaN	NaN	NaN	NaN	NaN	NaN	NaN	NaN	NaN	NaN	NaN	NaN	NaN	NaN
28.5	NaN	NaN	0.836055	0.822358	0.840883	0.803683	0.793311	0.822538	0.801674	0.792944	0.840377	0.835608	0.817221	0.773428	0.728273	0.727899	0.767529	0.74025	0.734847	0.677406	0.616178	0.519646	0.72886	0.772426	0.56936	0.586763	0.377276	0.374779	0.27404	NaN	NaN	NaN	NaN	NaN	NaN	NaN	NaN	NaN	NaN	NaN	NaN	NaN	NaN	NaN	NaN	NaN	NaN	NaN	NaN
27.5	NaN	NaN	0.856883	0.855809	0.813244	0.833999	0.833675	0.846181	0.84013	0.813149	0.83154	0.82515	0.805932	0.757172	0.77464	0.717599	0.637886	0.682776	0.661834	0.64424	0.699239	0.636712	0.555294	0.619529	0.504966	0.668678	0.404795	0.44773	0.359249	NaN	NaN	NaN	NaN	NaN	NaN	NaN	NaN	NaN	NaN	NaN	NaN	NaN	NaN	NaN	NaN	NaN	NaN	NaN	NaN
26.5	NaN	NaN	0.864071	0.865802	0.82614	0.836011	0.869843	0.84025	0.843133	0.834233	0.832953	0.844792	0.739303	0.700385	0.748642	0.651582	0.61842	0.680787	0.646655	0.687403	0.613769	0.679111	0.577184	0.438267	0.425731	0.391839	0.48578	0.0918733	NaN	NaN	NaN	NaN	NaN	NaN	NaN	NaN	NaN	NaN	NaN	NaN	NaN	NaN	NaN	NaN	NaN	NaN	NaN	NaN	NaN
25.5	NaN	NaN	0.858273	0.875497	0.841742	0.815573	0.827666	0.829737	0.848047	0.811282	0.801981	0.759189	0.66835	0.716906	0.744453	0.673396	0.71241	0.758739	0.666912	0.72491	0.675268	0.763867	0.641547	0.583147	0.321717	0.492923	0.327727	0.286103	NaN	NaN	NaN	NaN	NaN	NaN	NaN	NaN	NaN	NaN	NaN	NaN	NaN	NaN	NaN	NaN	NaN	NaN	NaN	NaN	NaN
24.5	NaN	NaN	0.868594	0.859601	0.862259	0.86459	0.854004	0.841595	0.793604	0.812745	0.736004	0.683711	0.66591	0.617469	0.656669	0.673798	0.688059	0.71775	0.540145	0.668297	0.657303	0.66659	0.668889	0.604506	0.453246	0.495037	0.410045	NaN	NaN	NaN	NaN	NaN	NaN	NaN	NaN	NaN	NaN	NaN	NaN	NaN	NaN	NaN	NaN	NaN	NaN	NaN	NaN	NaN	NaN
23.5	NaN	NaN	0.861258	0.85743	0.815586	0.83211	0.826042	0.798474	0.785979	0.741001	0.712051	0.695239	0.64782	0.663859	0.695339	0.592307	0.527307	0.53	0.442422	0.50387	0.559876	0.604426	0.60126	0.565059	0.585715	0.586619	NaN	NaN	NaN	NaN	NaN	NaN	NaN	NaN	NaN	NaN	NaN	NaN	NaN	NaN	NaN	NaN	NaN	NaN	NaN	NaN	NaN	NaN	NaN
22.5	NaN	NaN	0.817812	0.847934	0.818194	0.791369	0.763891	0.802223	0.791001	0.71105	0.687459	0.63899	0.692545	0.702585	0.573443	0.564197	0.550325	0.287715	0.280458	0.31739	0.32819	NaN	NaN	NaN	NaN	NaN	NaN	NaN	NaN	NaN	NaN	NaN	NaN	NaN	NaN	NaN	NaN	NaN	NaN	NaN	NaN	NaN	NaN	NaN	NaN	NaN	NaN	NaN	NaN
21.5	NaN	NaN	0.83419	0.80288	0.789177	0.796264	0.811291	0.811292	0.723034	0.721645	0.651664	0.704122	0.693478	0.685756	0.66168	0.455131	0.417285	0.17926	0.588631	0.348742	NaN	NaN	NaN	NaN	NaN	NaN	NaN	NaN	NaN	NaN	NaN	NaN	NaN	NaN	NaN	NaN	NaN	NaN	NaN	NaN	NaN	NaN	NaN	NaN	NaN	NaN	NaN	NaN	NaN
20.5	NaN	NaN	0.822325	0.786438	0.822082	0.801896	0.790313	0.772885	0.795444	0.687634	0.6862	0.708638	0.649593	0.685499	0.635688	0.616445	0.527724	0.359275	0.363964	0.525152	NaN	NaN	NaN	NaN	NaN	NaN	NaN	NaN	NaN	NaN	NaN	NaN	NaN	NaN	NaN	NaN	NaN	NaN	NaN	NaN	NaN	NaN	NaN	NaN	NaN	NaN	NaN	NaN	NaN
19.5	NaN	NaN	0.824645	0.78135	0.789216	0.801172	0.797588	0.715896	0.742914	0.71704	0.631233	0.662815	0.689725	0.621052	0.584583	0.608585	0.564863	0.355554	NaN	NaN	NaN	NaN	NaN	NaN	NaN	NaN	NaN	NaN	NaN	NaN	NaN	NaN	NaN	NaN	NaN	NaN	NaN	NaN	NaN	NaN	NaN	NaN	NaN	NaN	NaN	NaN	NaN	NaN	NaN
18.5	NaN	NaN	0.802746	0.794305	0.760706	0.784148	0.737561	0.721747	0.764815	0.630679	0.65135	0.690679	0.405514	0.607682	0.64063	0.690498	0.62336	NaN	NaN	NaN	NaN	NaN	NaN	NaN	NaN	NaN	NaN	NaN	NaN	NaN	NaN	NaN	NaN	NaN	NaN	NaN	NaN	NaN	NaN	NaN	NaN	NaN	NaN	NaN	NaN	NaN	NaN	NaN	NaN
17.5	NaN	NaN	0.793975	0.764666	0.801854	0.74989	0.701841	0.564409	0.54913	0.624236	0.701504	0.645189	0.505403	0.653274	0.634383	0.640469	NaN	NaN	NaN	NaN	NaN	NaN	NaN	NaN	NaN	NaN	NaN	NaN	NaN	NaN	NaN	NaN	NaN	NaN	NaN	NaN	NaN	NaN	NaN	NaN	NaN	NaN	NaN	NaN	NaN	NaN	NaN	NaN	NaN
16.5	NaN	NaN	0.765023	0.724861	0.736679	0.787966	0.622727	0.591006	0.500588	0.566051	0.57388	0.641243	0.681017	0.598589	0.571499	0.723846	NaN	NaN	NaN	NaN	NaN	NaN	NaN	NaN	NaN	NaN	NaN	NaN	NaN	NaN	NaN	NaN	NaN	NaN	NaN	NaN	NaN	NaN	NaN	NaN	NaN	NaN	NaN	NaN	NaN	NaN	NaN	NaN	NaN
15.5	NaN	NaN	0.69037	0.684392	0.696448	0.695621	0.733621	0.731111	0.626415	0.700791	0.68782	0.776575	0.675926	0.694981	0.713413	0.706816	NaN	NaN	NaN	NaN	NaN	NaN	NaN	NaN	NaN	NaN	NaN	NaN	NaN	NaN	NaN	NaN	0.750955	0.600242	0.709786	0.693963	0.750105	0.747486	0.802832	0.846688	NaN	NaN	NaN	0.69629	0.563541	0.566177	0.562381	0.796444	0.739575
14.5	NaN	NaN	0.782211	0.63745	0.722817	0.755473	0.790476	0.698742	0.76997	0.802711	0.772766	0.764211	0.804279	0.753132	0.728131	0.761705	0.575423	0.604713	0.604607	0.401678	0.455753	0.482771	0.360963	0.471557	0.462547	0.419352	0.382071	0.745954	0.770587	0.606484	0.646744	0.663241	0.832895	0.681913	0.856195	0.864755	0.84989	0.821723	0.786514	0.810523	0.77439	0.782096	0.696727	0.813215	0.755033	0.728777	0.841869	0.827199	0.822375
13.5	NaN	NaN	0.800863	0.685437	0.770012	0.757304	0.792184	0.804423	0.860172	0.806778	0.828602	0.821061	0.845086	0.844896	0.781093	0.841082	0.791396	0.718087	0.768753	0.748012	0.734139	0.686714	0.710845	0.74042	0.714145	0.74704	0.758602	0.743582	0.743941	0.798509	0.810062	0.76489	0.790904	0.845812	0.838697	0.851672	0.85091	0.852379	0.86363	0.861011	0.843888	0.849393	0.845178	0.830288	0.843062	0.837704	0.861199	0.897555	0.847776
12.5	NaN	NaN	0.80593	0.759646	0.749201	0.708248	0.680643	0.710696	0.770939	0.848008	0.860817	0.858702	0.883919	0.849334	0.813521	0.83077	0.7972	0.809588	0.820996	0.815257	0.768425	0.726858	0.77599	0.73113	0.66856	0.68913	0.792972	0.858021	0.879456	0.851548	0.875504	0.841302	0.878876	0.824304	0.842467	0.852545	0.868311	0.884962	0.883918	0.880452	0.855249	0.884927	0.861151	0.886085	0.885463	0.871481	0.889827	0.884098	0.889847
11.5	NaN	NaN	0.869914	0.833002	0.805664	0.758205	0.760512	0.751474	0.821904	0.841646	0.824743	0.856633	0.830124	0.815672	0.800081	0.794236	0.818533	0.827262	0.845182	0.854731	0.789485	0.803506	0.840939	0.812908	0.828282	0.84894	0.853566	0.855117	0.87153	0.908592	0.894192	0.909278	0.896553	0.883823	0.87441	0.854085	0.81561	0.857729	0.894246	0.908887	0.911729	0.924121	0.9208	0.923512	0.921812	0.927482	0.93504	0.911058	0.923239
10.5	NaN	NaN	0.887534	0.854297	0.864333	0.837491	0.833171	0.841828	0.853322	0.886188	0.881397	0.896759	0.865174	0.852848	0.8547	0.829524	0.861833	0.85662	0.882996	0.900271	0.876557	0.862535	0.873959	0.879939	0.850269	0.862734	0.893351	0.896033	0.89822	0.906859	0.903592	0.891837	0.899706	0.897149	0.897628	0.898809	0.887443	0.88892	0.915889	0.938046	0.94207	0.925557	0.920118	0.928639	0.949532	0.92824	0.943605	0.938862	0.936795
9.5	NaN	NaN	0.925382	0.922948	0.880798	0.868983	0.87339	0.878312	0.873914	0.913633	0.923978	0.910518	0.918659	0.880517	0.894441	0.911015	0.912991	0.909719	0.919478	0.931178	0.916116	0.911008	0.911252	0.913861	0.891072	0.881755	0.9064	0.902214	0.91495	0.913944	0.902469	0.900454	0.914793	0.921929	0.919359	0.917258	0.934917	0.936199	0.934006	0.938232	0.937596	0.942945	0.934074	0.947656	0.949321	0.937269	0.940411	0.926876	0.937265
8.5	NaN	NaN	0.942607	0.943306	0.92225	0.904623	0.896608	0.911983	0.91968	0.939643	0.94054	0.934282	0.908812	0.898879	0.898984	0.914124	0.920349	0.926634	0.932074	0.944592	0.943528	0.93184	0.926129	0.924769	0.902546	0.904053	0.915683	0.918153	0.92288	0.934907	0.918156	0.918076	0.937574	0.93141	0.942561	0.949787	0.946056	0.945987	0.940207	0.931241	0.922136	0.929813	0.937065	0.940119	0.954662	0.936639	0.950376	0.936122	0.944109
7.5	NaN	NaN	0.95107	0.942392	0.91875	0.925724	0.931212	0.938568	0.929804	0.947262	0.943339	0.94048	0.929622	0.927024	0.927416	0.942886	0.936965	0.939465	0.941915	0.936585	0.93112	0.94601	0.936613	0.918382	0.896243	0.907589	0.903505	0.897488	0.898233	0.922727	0.924547	0.935449	0.937758	0.942782	0.942726	0.958059	0.947559	0.942687	0.926722	0.912454	0.921619	0.922379	0.938248	0.94154	0.944406	0.933034	0.955622	0.946473	0.945328
6.5	NaN	NaN	0.948259	0.936926	0.938171	0.934701	0.932019	0.928899	0.949014	0.940183	0.942115	0.938845	0.939396	0.921295	0.921182	0.93134	0.937584	0.931327	0.943632	0.934676	0.941327	0.930008	0.928697	0.913077	0.891462	0.887108	0.899457	0.898409	0.912384	0.918322	0.91492	0.920572	0.912691	0.932818	0.929677	0.951013	0.951742	0.9371	0.912725	0.915036	0.904028	0.915319	0.919311	0.925446	0.932315	0.910797	0.931669	0.925691	0.92603
5.5	NaN	NaN	0.951756	0.9233	0.92876	0.93386	0.941806	0.940664	0.946162	0.944663	0.940648	0.937974	0.931898	0.939097	0.932207	0.938567	0.939321	0.943584	0.948404	0.937467	0.930995	0.91334	0.907257	0.881763	0.87756	0.880256	0.889718	0.900338	0.907531	0.933176	0.917337	0.922083	0.918084	0.921173	0.921699	0.934693	0.93785	0.929421	0.901599	0.890393	0.886788	0.884023	0.891498	0.927327	0.920047	0.893989	0.90576	0.912731	0.879501
4.5	NaN	NaN	0.944417	0.91457	0.930391	0.933372	0.941696	0.940339	0.950218	0.939506	0.944129	0.933884	0.93177	0.919302	0.914268	0.91394	0.927085	0.91753	0.923264	0.921599	0.93358	0.895892	0.885227	0.867625	0.851964	0.840956	0.835347	0.87551	0.855596	0.890274	0.88106	0.897367	0.906374	0.899091	0.895413	0.912045	0.887686	0.869042	0.846113	0.852885	0.862044	0.846112	0.859405	0.892184	0.89146	0.816449	0.883178	0.897996	0.889048
3.5	NaN	NaN	0.941887	0.930993	0.928407	0.939529	0.929861	0.922058	0.930548	0.923259	0.923499	0.922182	0.913594	0.891955	0.890733	0.873447	0.872765	0.900236	0.879401	0.887297	0.902691	0.871057	0.837168	0.814189	0.831448	0.790793	0.798839	0.802252	0.820337	0.851868	0.846757	0.90503	0.89304	0.884646	0.871029	0.878363	0.848034	0.834101	0.820579	0.841062	0.865601	0.860068	0.819713	0.795334	0.818048	NaN	NaN	NaN	NaN
2.5	NaN	NaN	0.926208	0.911256	0.90373	0.90062	0.891685	0.883999	0.907891	0.901853	0.890095	0.853717	0.84471	0.84969	0.799903	0.809685	0.827387	0.805016	0.818918	0.854748	0.842946	0.816212	0.769254	0.737158	0.761427	0.719436	0.757833	0.756436	0.682523	0.806509	0.844819	0.827661	0.846724	0.818293	0.72918	0.817789	0.744179	0.784512	0.781804	NaN	NaN	NaN	NaN	NaN	NaN	NaN	NaN	NaN	NaN
1.5	NaN	NaN	0.88703	0.87734	0.870246	0.871781	0.84079	0.82509	0.870621	0.828513	0.787532	0.791038	0.795437	0.8593	0.806868	0.744372	0.787055	0.780716	0.728165	0.809811	0.804558	0.745999	0.700634	0.689107	0.624948	NaN	NaN	NaN	NaN	NaN	NaN	NaN	NaN	NaN	NaN	NaN	NaN	NaN	NaN	NaN	NaN	NaN	NaN	NaN	NaN	NaN	NaN	NaN	NaN
0.5	NaN	NaN	0.837136	0.788193	0.821116	0.777402	0.776763	0.790263	0.817305	0.861818	0.854071	0.864175	0.851136	0.829439	0.81462	0.746497	0.680845	NaN	NaN	NaN	NaN	NaN	NaN	NaN	NaN	NaN	NaN	NaN	NaN	NaN	NaN	NaN	NaN	NaN	NaN	NaN	NaN	NaN	NaN	NaN	NaN	NaN	NaN	NaN	NaN	NaN	NaN	NaN	NaN
-0.5	NaN	NaN	0.800041	0.759939	0.758785	0.728896	0.758235	0.736877	0.708085	0.797853	0.868574	0.804641	0.786344	0.852997	NaN	NaN	NaN	NaN	NaN	NaN	NaN	NaN	NaN	NaN	NaN	NaN	NaN	NaN	NaN	NaN	NaN	NaN	NaN	NaN	NaN	NaN	NaN	NaN	NaN	NaN	NaN	NaN	NaN	NaN	NaN	NaN	NaN	NaN	NaN
-1.5	NaN	NaN	0.83126	0.791679	0.775828	0.718557	0.679482	0.687891	0.780748	0.777963	0.847489	0.796985	0.782397	0.781534	0.844727	NaN	NaN	NaN	NaN	NaN	NaN	NaN	NaN	NaN	NaN	NaN	NaN	NaN	NaN	NaN	NaN	NaN	NaN	NaN	NaN	NaN	NaN	NaN	NaN	NaN	NaN	NaN	NaN	NaN	NaN	NaN	NaN	NaN	NaN
-2.5	NaN	NaN	0.838034	0.830874	0.7976	0.757634	0.687628	0.733883	0.698051	0.719272	0.870055	0.770619	0.793585	0.886638	0.731695	0.7208	0.709399	0.762883	NaN	NaN	NaN	NaN	NaN	NaN	NaN	NaN	NaN	NaN	NaN	NaN	NaN	NaN	NaN	NaN	NaN	NaN	NaN	NaN	NaN	NaN	NaN	NaN	NaN	NaN	NaN	NaN	NaN	NaN	NaN
-3.5	NaN	NaN	0.887066	0.876402	0.858697	0.81928	0.73537	0.774181	0.777571	0.747452	0.791596	0.857991	0.794095	0.829048	0.885114	0.802845	0.794183	0.796863	0.737135	NaN	NaN	NaN	NaN	NaN	NaN	NaN	NaN	NaN	NaN	NaN	NaN	NaN	NaN	NaN	NaN	NaN	NaN	NaN	NaN	NaN	NaN	NaN	NaN	NaN	NaN	NaN	NaN	NaN	NaN
-4.5	NaN	NaN	0.889885	0.881224	0.888031	0.844474	0.795686	0.815449	0.798868	0.762378	0.804129	0.811502	0.831241	0.84982	0.79732	0.834202	0.857331	0.78309	0.753983	0.801063	0.811088	NaN	NaN	NaN	NaN	NaN	NaN	NaN	NaN	NaN	NaN	NaN	NaN	NaN	NaN	NaN	NaN	NaN	NaN	NaN	NaN	NaN	NaN	NaN	NaN	NaN	NaN	NaN	NaN
-5.5	NaN	NaN	0.902551	0.888769	0.903718	0.860258	0.840913	0.846931	0.821091	0.833805	0.833754	0.837751	0.832556	0.825451	0.873863	0.831909	0.828558	0.852243	0.767688	0.767691	0.700272	0.734757	0.732249	0.783774	NaN	NaN	NaN	NaN	NaN	NaN	NaN	NaN	NaN	NaN	NaN	NaN	NaN	NaN	NaN	NaN	NaN	NaN	NaN	NaN	NaN	NaN	NaN	NaN	NaN
-6.5	NaN	NaN	0.92016	0.895292	0.895429	0.862222	0.868029	0.880556	0.864092	0.859481	0.876036	0.861346	0.873141	0.881412	0.869776	0.892185	0.836619	0.832785	0.821166	0.805126	0.770729	0.813875	0.807833	0.780279	0.745451	0.741192	NaN	NaN	NaN	NaN	NaN	NaN	NaN	NaN	NaN	NaN	NaN	NaN	NaN	NaN	NaN	NaN	NaN	NaN	NaN	NaN	NaN	NaN	NaN
-7.5	NaN	NaN	0.915438	0.917383	0.903189	0.89184	0.883133	0.904899	0.890409	0.884009	0.890355	0.888727	0.909884	0.909776	0.902738	0.899836	0.895895	0.850654	0.860891	0.765323	0.786288	0.802517	0.805626	0.80047	0.676961	0.803604	0.810756	0.770981	NaN	NaN	NaN	NaN	NaN	NaN	NaN	NaN	NaN	NaN	NaN	NaN	NaN	NaN	NaN	NaN	NaN	NaN	NaN	NaN	NaN
-8.5	NaN	NaN	0.920511	0.914046	0.91456	0.90825	0.912174	0.900809	0.911816	0.909426	0.90058	0.901533	0.926248	0.912852	0.901488	0.904109	0.882428	0.884731	0.847201	0.812132	0.813939	0.758751	0.830151	0.843731	0.80586	0.766968	0.728766	0.750592	0.728087	0.787917	0.85139	NaN	NaN	NaN	NaN	NaN	NaN	NaN	NaN	NaN	NaN	NaN	NaN	NaN	NaN	NaN	NaN	NaN	NaN
-9.5	NaN	NaN	0.9209	0.918524	0.915368	0.884021	0.891871	0.902082	0.925976	0.918265	0.897628	0.91008	0.923466	0.905824	0.890313	0.899764	0.879453	0.875669	0.851413	0.778692	0.779551	0.82772	0.769032	0.772151	0.830249	0.874607	0.853636	0.8037	0.825864	0.861658	0.873727	NaN	NaN	NaN	NaN	NaN	NaN	NaN	NaN	NaN	NaN	NaN	NaN	NaN	NaN	NaN	NaN	NaN	NaN
-10.5	NaN	NaN	0.904673	0.915609	0.915428	0.882177	0.895151	0.913863	0.923232	0.910877	0.909193	0.898713	0.888686	0.866029	0.872339	0.891479	0.882561	0.859688	0.835007	0.824851	0.823264	0.777909	0.817984	0.824963	0.72274	0.793088	0.775527	0.797963	0.784589	0.856261	0.790934	0.855566	NaN	NaN	NaN	NaN	NaN	NaN	NaN	NaN	NaN	NaN	NaN	NaN	NaN	NaN	NaN	NaN	NaN
-11.5	NaN	NaN	0.910526	0.913743	0.90519	0.900774	0.901205	0.896884	0.915572	0.914939	0.886821	0.879719	0.860757	0.820352	0.845511	0.849134	0.874937	0.87254	0.879552	0.824151	0.832185	0.814996	0.783476	0.753084	0.802649	0.773494	0.701744	0.791738	0.79337	0.852609	0.803037	0.830177	NaN	NaN	NaN	NaN	NaN	NaN	NaN	NaN	NaN	NaN	NaN	NaN	NaN	NaN	NaN	NaN	NaN
-12.5	NaN	NaN	0.903819	0.910596	0.891943	0.895289	0.889604	0.89145	0.903538	0.885473	0.876901	0.852327	0.811871	0.799647	0.7984	0.833419	0.813121	0.840884	0.834569	0.799135	0.79721	0.746976	0.756882	0.740489	0.781155	0.783138	0.686557	0.800184	0.765777	0.811298	0.821278	NaN	NaN	NaN	NaN	NaN	NaN	NaN	NaN	NaN	NaN	NaN	NaN	NaN	NaN	NaN	NaN	NaN	NaN
-13.5	NaN	NaN	0.883759	0.893714	0.88938	0.886692	0.879549	0.873314	0.863442	0.849422	0.835109	0.802452	0.814914	0.794962	0.797377	0.828016	0.851759	0.849376	0.826416	0.81572	0.752432	0.746195	0.766758	0.737836	0.777942	0.7952	0.790262	0.751474	NaN	NaN	NaN	NaN	NaN	NaN	NaN	NaN	NaN	NaN	NaN	NaN	NaN	NaN	NaN	NaN	NaN	NaN	NaN	NaN	NaN
-14.5	NaN	NaN	0.860238	0.896075	0.88631	0.904022	0.892636	0.87594	0.83855	0.832613	0.825538	0.803148	0.789418	0.80678	0.817209	0.829634	0.815162	0.835442	0.810829	0.781623	0.804356	0.775013	0.778583	0.705202	0.711043	0.764677	0.65567	NaN	NaN	NaN	NaN	NaN	NaN	NaN	NaN	NaN	NaN	NaN	NaN	NaN	NaN	NaN	NaN	NaN	NaN	NaN	NaN	NaN	NaN
-15.5	NaN	NaN	0.799373	0.826939	0.880212	0.89501	0.881908	0.866744	0.80598	0.777441	0.794657	0.784847	0.778138	0.7895	0.79102	0.833032	0.813709	0.784757	0.812413	0.812218	0.807104	0.796224	0.736292	0.6956	0.668678	0.651347	0.707836	NaN	NaN	NaN	NaN	NaN	NaN	NaN	NaN	NaN	NaN	NaN	NaN	NaN	NaN	NaN	NaN	NaN	NaN	NaN	NaN	NaN	NaN
-16.5	NaN	NaN	0.697571	0.797828	0.891301	0.888324	0.85154	0.840046	0.817564	0.789624	0.787778	0.813335	0.828893	0.765566	0.822807	0.77795	0.751959	0.724457	0.757569	0.818013	0.800174	0.794611	0.755354	0.672673	0.703961	0.806553	NaN	NaN	NaN	NaN	NaN	NaN	NaN	NaN	NaN	NaN	0.765594	0.772266	0.788148	0.813845	0.816386	0.806634	0.806231	0.811844	NaN	NaN	NaN	NaN	NaN
-17.5	NaN	NaN	0.75365	0.836866	0.846302	0.859337	0.843913	0.815269	0.838484	0.797731	0.823481	0.792425	0.759607	0.836409	0.811131	0.808261	0.782005	0.718773	0.696511	0.674431	0.690926	0.82178	0.786551	0.741998	0.758201	0.770972	0.715715	NaN	NaN	NaN	NaN	NaN	NaN	NaN	NaN	0.799108	0.749193	0.785649	0.789782	0.787363	0.757832	0.849306	0.855581	0.844289	0.810574	0.824735	0.842824	NaN	NaN
-18.5	NaN	NaN	0.73121	0.814121	0.84857	0.861396	0.856876	0.852649	0.813848	0.825163	0.811664	0.806452	0.794195	0.797265	0.780049	0.816631	0.733254	0.698634	0.727622	0.761334	0.723479	0.842909	0.63723	0.787906	0.78908	0.772731	0.817301	0.835112	NaN	NaN	NaN	NaN	NaN	NaN	0.791614	0.780072	0.802328	0.767177	0.86236	0.82896	0.694312	0.774732	0.768851	0.799527	0.728274	0.752032	0.8277	0.882537	0.869621
-19.5	NaN	NaN	0.728353	0.805774	0.850842	0.853734	0.858506	0.849319	0.865439	0.86558	0.836823	0.813783	0.788664	0.807663	0.749853	0.770401	0.700799	0.701036	0.772243	0.743875	0.746113	0.787878	0.766444	0.769697	0.756168	0.786997	0.798687	0.780245	0.816514	NaN	NaN	NaN	0.787942	0.780881	0.753487	0.809531	0.835735	0.848567	0.892885	0.861117	0.811429	0.843273	0.798759	0.800041	0.780426	0.808978	0.837834	0.785098	0.85782
-20.5	NaN	NaN	0.735004	0.785783	0.87087	0.872085	0.835425	0.838678	0.854238	0.87196	0.856605	0.847007	0.793074	0.806942	0.776815	0.758905	0.745371	0.753308	0.734897	0.750468	0.76243	0.78516	0.796383	0.788953	0.852569	0.813852	0.81185	0.814896	0.795576	0.743951	0.774829	0.798252	0.790616	0.785342	0.756347	0.799248	0.818163	0.843012	0.865801	0.881228	0.810742	0.83769	0.843879	0.834752	0.816566	0.827534	0.839167	0.85128	0.858978
-21.5	NaN	NaN	0.820617	0.817637	0.817095	0.83642	0.822045	0.833619	0.788617	0.818848	0.817352	0.802154	0.75516	0.814412	0.773889	0.758027	0.80982	0.783532	0.770344	0.776608	0.765623	0.724587	0.764034	0.774191	0.751953	0.793851	0.803093	0.803684	0.808244	0.814874	0.806404	0.837138	0.816796	0.805249	0.829975	0.802492	0.798149	0.822357	0.835689	0.854785	0.845473	0.843707	0.837195	0.877478	0.856715	0.877584	0.825914	0.851293	0.839466
-22.5	NaN	NaN	0.811581	0.745624	0.747728	0.82365	0.810494	0.815984	0.804333	0.771697	0.810384	0.786552	0.755728	0.802901	0.800291	0.811734	0.820719	0.792968	0.78509	0.772661	0.726983	0.738612	0.756964	0.686895	0.695468	0.759848	0.762126	0.782352	0.812156	0.837032	0.829194	0.838773	0.829245	0.814306	0.817077	0.826216	0.815853	0.824233	0.833496	0.838405	0.864327	0.871617	0.86259	0.870165	0.858035	0.846569	0.860271	0.861971	0.862235
-23.5	NaN	NaN	0.7906	0.769186	0.792097	0.805298	0.804186	0.758313	0.776477	0.787895	0.804401	0.801836	0.776359	0.794682	0.848399	0.811634	0.834788	0.822595	0.855478	0.792915	0.75902	0.759635	0.776517	0.724845	0.734883	0.796162	0.795173	0.815421	0.810757	0.848328	0.863057	0.854202	0.842391	0.823295	0.811309	0.825771	0.834784	0.827757	0.844629	0.850669	0.868835	0.87802	0.88965	0.886536	0.867506	0.863896	0.857111	0.852019	0.870237
-24.5	NaN	NaN	0.802563	0.80356	0.806079	0.823083	0.767716	0.811557	0.824427	0.790667	0.812668	0.823798	0.804051	0.826636	0.823129	0.812835	0.818476	0.830402	0.8554	0.828235	0.811923	0.81012	0.769353	0.764366	0.75628	0.810576	0.810022	0.824091	0.818627	0.857634	0.829025	0.850119	0.861901	0.866564	0.856957	0.849904	0.848372	0.856721	0.846629	0.85795	0.888028	0.867474	0.887951	0.884116	0.879624	0.861681	0.871141	0.872618	0.872227
-25.5	NaN	NaN	0.841662	0.851265	0.820211	0.805581	0.754851	0.780298	0.782965	0.751578	0.79454	0.83213	0.831934	0.840618	0.83519	0.837169	0.822834	0.846503	0.867253	0.852653	0.835957	0.789946	0.806827	0.767376	0.763229	0.803061	0.81015	0.81257	0.798509	0.82405	0.84859	0.864488	0.86862	0.841457	0.837604	0.84853	0.852979	0.862828	0.878784	0.893262	0.902993	0.901535	0.885874	0.8825	0.864691	0.857987	0.870593	0.854022	0.872399
-26.5	NaN	NaN	0.873815	0.873215	0.868535	0.833591	0.782294	0.758615	0.780981	0.772663	0.818967	0.834874	0.865921	0.857611	0.85716	0.865402	0.881923	0.868602	0.869685	0.85592	0.852691	0.856102	0.807181	0.824401	0.832738	0.864103	0.859258	0.857511	0.841544	0.862558	0.866258	0.853975	0.837684	0.834932	0.827964	0.860919	0.864212	0.864228	0.87525	0.891312	0.891483	0.905538	0.884702	0.895268	0.853842	0.87852	0.882782	0.869	0.878845
-27.5	NaN	NaN	0.885713	0.881474	0.853946	0.847784	0.816697	0.78183	0.785015	0.781763	0.805109	0.84826	0.84564	0.858243	0.869702	0.866163	0.896273	0.887404	0.887313	0.884551	0.871899	0.883502	0.843902	0.881334	0.858475	0.872138	0.868841	0.87502	0.858291	0.853876	0.865209	0.873043	0.872247	0.846345	0.865775	0.859348	0.868506	0.874761	0.874622	0.889163	0.888823	0.905311	0.895325	0.913794	0.885051	0.876753	0.876659	0.887999	0.888293
-28.5	NaN	NaN	0.904021	0.906304	0.900822	0.867002	0.85688	0.85311	0.817337	0.8353	0.814161	0.829754	0.847821	0.864853	0.868649	0.878552	0.897499	0.893856	0.876308	0.876093	0.861511	0.874533	0.865025	0.894592	0.866502	0.890137	0.894965	0.882023	0.868296	0.871869	0.858312	0.892955	0.887874	0.855667	0.877334	0.875343	0.86078	0.881398	0.882581	0.890744	0.898282	0.905688	0.913825	0.909091	0.892261	0.896828	0.893474	0.895493	0.889274
-29.5	NaN	NaN	0.841027	0.857199	0.858948	0.878091	0.864484	0.836753	0.839735	0.818588	0.794096	0.797191	0.857717	0.84814	0.874121	0.866126	0.894911	0.900517	0.858242	0.856341	0.864536	0.867639	0.874783	0.887464	0.849066	0.860325	0.86172	0.860821	0.867733	0.882128	0.87177	0.892824	0.906329	0.896535	0.898759	0.876701	0.858072	0.87396	0.85901	0.871917	0.895772	0.908949	0.904056	0.904481	0.879948	0.884877	0.896094	0.895756	0.883998
-30.5	NaN	NaN	0.819874	0.8611	0.823835	0.886276	0.875291	0.885224	0.867473	0.823311	0.804232	0.817817	0.867024	0.867795	0.870382	0.889466	0.883691	0.895137	0.868479	0.869908	0.846499	0.885873	0.88016	0.894871	0.880319	0.878214	0.879786	0.875258	0.850231	0.86074	0.875315	0.904942	0.903543	0.899473	0.893076	0.877106	0.855668	0.854439	0.855458	0.855153	0.865615	0.880319	0.903307	0.913678	0.906913	0.903587	0.874134	0.889587	0.874938
-31.5	NaN	NaN	0.775735	0.816951	0.868758	0.875134	0.839618	0.873403	0.880109	0.830775	0.832143	0.835469	0.843236	0.841836	0.865439	0.868596	0.878022	0.875973	0.844507	0.857867	0.863029	0.878072	0.868713	0.922014	0.875239	0.874287	0.83934	0.838906	0.835275	0.858411	0.867619	0.878156	0.88821	0.890462	0.905239	0.869832	0.875337	0.881536	0.887881	0.889879	0.881705	0.874673	0.884167	0.899409	0.904086	0.92345	0.90075	0.902846	0.892263
-32.5	NaN	NaN	0.819616	0.808233	0.854969	0.865218	0.840892	0.852812	0.807285	0.850938	0.815987	0.793645	0.84521	0.872832	0.815089	0.840074	0.840429	0.779024	0.849289	0.858512	0.844532	0.86832	0.87368	0.878483	0.886171	0.876995	0.855558	0.845563	0.832903	0.843327	0.879513	0.869902	0.822659	0.861316	0.8471	0.86067	0.858964	0.839106	0.854469	0.892668	0.888567	0.862341	0.904008	0.902478	0.909176	0.911081	0.893302	0.889722	0.868463
-33.5	NaN	NaN	0.844445	0.827641	0.781027	0.79238	0.839205	0.826587	0.807422	0.821037	0.84469	0.817204	0.866054	0.882712	0.862245	0.849739	0.809133	0.824797	0.820561	0.835115	0.84658	0.823584	0.843501	0.880949	0.849776	0.869936	0.849226	0.856799	0.844098	0.863418	0.861396	0.855492	0.883643	0.88172	0.856151	0.837851	0.802132	0.838771	0.804588	0.866903	0.89218	0.852522	0.872585	0.871674	0.858601	0.898447	0.817585	0.843985	0.851781
-34.5	NaN	NaN	0.817079	0.787345	0.787225	0.799764	0.808027	0.852748	0.815186	0.826015	0.856234	0.893506	0.86956	0.873996	0.860595	0.843253	0.809755	0.788679	0.733982	0.772541	0.803555	0.805376	0.80354	0.820765	0.826383	0.856296	0.846422	0.849573	0.828323	0.849998	0.819271	0.833397	0.858503	0.85404	0.847887	0.856806	0.79832	0.840939	0.844162	0.891473	0.782413	0.869876	0.87003	0.823527	0.864544	0.862809	0.855042	0.839546	0.81571
-35.5	NaN	NaN	0.850463	0.862753	0.863888	0.862554	0.820744	0.811819	0.796474	0.844918	0.842495	0.795836	0.812092	0.874445	0.848351	0.825398	0.793272	0.784578	0.778535	0.791108	0.766236	0.793303	0.849686	0.797488	0.838852	0.844954	0.864371	0.858365	0.840014	0.841176	0.831046	0.819393	0.780064	0.79497	0.841797	0.840882	0.867474	0.81083	0.890391	0.869226	0.823951	0.87454	0.847409	0.797243	0.785724	0.826876	0.826658	0.827994	0.844352
-36.5	NaN	NaN	0.866878	0.811492	0.769786	0.835745	0.779199	0.786587	0.826784	0.857195	0.82402	0.81975	0.779774	0.837309	0.752381	0.685717	0.697043	0.67333	0.756926	0.743285	0.739991	0.784201	0.798829	0.803233	0.79784	0.817757	0.833438	0.851124	0.836033	0.771506	0.844577	0.827559	0.842312	0.850342	0.859277	0.83503	0.843472	0.831532	0.860495	0.890101	0.859883	0.869585	0.874981	0.816632	0.81506	0.81814	0.789288	0.748887	0.825328
-37.5	NaN	NaN	0.829791	0.800786	0.780203	0.700616	0.70261	0.75744	0.832597	0.852757	0.756013	0.810379	0.798474	0.780014	0.744118	0.798782	0.827435	0.802003	0.790159	0.797159	0.800657	0.765601	0.820862	0.78357	0.780707	0.817554	0.817713	0.805882	0.825467	0.82524	0.793452	0.794573	0.818843	0.84987	0.87529	0.841809	0.813349	0.879129	0.861536	0.827422	0.739577	0.851166	0.767673	0.748899	0.803896	0.78993	0.751528	0.751758	0.771072
-38.5	NaN	NaN	0.767477	0.7193	0.748319	0.75793	0.745989	0.75183	0.742604	0.752744	0.782681	0.692874	0.838388	0.680386	0.79561	0.803709	0.794023	0.854087	0.798293	0.76018	0.773824	0.840953	0.817805	0.729091	0.805916	0.779627	0.820198	0.778159	0.765847	0.732715	0.70755	0.770753	0.762984	0.781377	0.793155	0.859742	0.77505	0.753077	0.719465	0.818808	0.80236	0.877452	0.821748	0.762392	0.766208	0.8291	0.832395	0.840258	0.778073
-39.5	NaN	NaN	0.763976	0.73343	0.66428	0.785269	0.752032	0.736797	0.750969	0.822492	0.836077	0.787801	0.797509	0.663885	0.677794	0.746368	0.743237	0.710714	0.844505	0.812829	0.784103	0.816103	0.857033	0.758541	0.809647	0.647953	0.729873	0.710857	0.738021	0.742039	0.679264	0.683271	0.779102	0.797981	0.843925	0.804318	0.802126	0.835726	0.81894	0.78768	0.869475	0.750429	0.726885	0.862345	0.814273	0.830062	0.854037	0.788655	0.792654
-40.5	NaN	NaN	0.748756	0.717922	0.696414	0.644605	0.697302	0.741364	0.752596	0.831557	0.804124	0.767215	0.719716	0.65345	0.666844	0.669385	0.732188	0.828348	0.842311	0.814281	0.856428	0.847463	0.812263	0.862881	0.819947	0.849002	0.817586	0.748504	0.725741	0.723383	0.676972	0.724146	0.714079	0.776812	0.809214	0.840583	0.863952	0.799143	0.831015	0.795313	0.747144	0.76506	0.798825	0.784353	0.821107	0.836378	0.850227	0.824352	0.739612
-41.5	NaN	NaN	0.630396	0.756351	0.744975	0.706002	0.731932	0.793051	0.79056	0.719978	0.794969	0.784121	0.67984	0.767228	0.755397	0.75696	0.789861	0.801988	0.826317	0.83298	0.856444	0.862428	0.819776	0.824619	0.851036	0.806524	0.781828	0.710674	0.752527	0.75271	0.679499	0.716652	0.650936	0.777957	0.768816	0.82716	0.825555	0.839163	0.791369	0.762269	0.727133	0.745493	0.756933	0.784484	0.841187	0.851334	0.860355	0.86278	0.785727
-42.5	NaN	NaN	0.629374	0.722635	0.797441	0.800633	0.678939	0.727056	0.736195	0.769283	0.755478	0.774707	0.75806	0.800484	0.799631	0.785757	0.819793	0.831003	0.745622	0.758145	0.821334	0.739589	0.773706	0.827038	0.826146	0.832592	0.814971	0.708711	0.71227	0.725489	0.602188	0.716518	0.797806	0.761964	0.751439	0.763854	0.819997	0.842887	0.783892	0.822953	0.834517	0.703093	0.778699	0.778324	0.815981	0.827028	0.871133	0.861956	0.803023
-43.5	NaN	NaN	0.587408	0.673986	0.748157	0.692266	0.747448	0.722466	0.759594	0.796668	0.795247	0.746246	0.807761	0.800426	0.777535	0.755305	0.793551	0.76776	0.740613	0.804731	0.813298	0.805689	0.776034	0.800994	0.75709	0.82235	0.736803	0.709062	0.686776	0.669887	0.685033	0.662421	0.76619	0.73817	0.732265	0.771878	0.796683	0.806349	0.774042	0.784101	0.768192	0.7322	0.707521	0.720799	0.804728	0.798277	0.872744	0.833118	0.804353
-44.5	NaN	NaN	0.561493	0.640521	0.617918	0.631541	0.667948	0.682492	0.698363	0.714542	0.693375	0.766275	0.793985	0.800121	0.803265	0.77673	0.727948	0.738459	0.725925	0.778791	0.780354	0.787241	0.804366	0.790071	0.742647	0.70151	0.764781	0.773938	0.702523	0.76264	0.748235	0.72855	0.722874	0.742065	0.701755	0.731895	0.760499	0.763834	0.746079	0.729212	0.771926	0.700923	0.686185	0.760016	0.807996	0.823164	0.852262	0.857799	0.779437
-45.5	NaN	NaN	0.556821	0.62976	0.690218	0.70276	0.702531	0.702655	0.725833	0.698242	0.662746	0.696422	0.750907	0.735257	0.771502	0.762854	0.765461	0.750539	0.699641	0.787944	0.744662	0.688419	0.668777	0.732238	0.776143	0.793292	0.633558	0.770243	0.776977	0.753017	0.733375	0.706899	0.732961	0.735996	0.703433	0.706039	0.680199	0.700374	0.716591	0.711203	0.747187	0.64653	0.748403	0.730378	0.791799	0.742868	0.771497	0.750611	0.785186
-46.5	NaN	NaN	0.525722	0.627932	0.654467	0.635464	0.671454	0.597303	0.656661	0.597632	0.621656	0.587449	0.759167	0.739134	0.722766	0.775337	0.798632	0.789694	0.766917	0.781338	0.77562	0.707654	0.664836	0.668427	0.709741	0.75848	0.681434	0.684412	0.773876	0.773875	0.76946	0.704869	0.74359	0.751962	0.686624	0.679005	0.633158	0.58958	0.635474	0.594139	0.637342	0.582017	0.677601	0.714534	0.71189	0.758701	0.74128	0.758978	0.757928
-47.5	NaN	NaN	0.527612	0.597522	0.655387	0.582682	0.577315	0.648422	0.64331	0.630718	0.616603	0.640997	0.592372	0.708448	0.768704	0.690903	0.75912	0.711099	0.778951	0.814924	0.851441	0.778554	0.707596	0.702706	0.775699	0.717923	0.77476	0.679965	0.779246	0.799375	0.738273	0.720726	0.737386	0.71745	0.601083	0.63584	0.606054	0.583221	0.57104	0.557521	0.564752	0.563292	0.642024	0.683151	0.709914	0.695075	0.733527	0.747541	0.745176
-48.5	NaN	NaN	NaN	NaN	NaN	NaN	NaN	NaN	NaN	NaN	NaN	NaN	NaN	NaN	NaN	NaN	NaN	NaN	NaN	NaN	NaN	NaN	NaN	NaN	NaN	NaN	NaN	NaN	NaN	NaN	NaN	NaN	NaN	NaN	NaN	NaN	NaN	NaN	NaN	NaN	NaN	NaN	NaN	NaN	NaN	NaN	NaN	NaN	NaN
-49.5	NaN	NaN	NaN	NaN	NaN	NaN	NaN	NaN	NaN	NaN	NaN	NaN	NaN	NaN	NaN	NaN	NaN	NaN	NaN	NaN	NaN	NaN	NaN	NaN	NaN	NaN	NaN	NaN	NaN	NaN	NaN	NaN	NaN	NaN	NaN	NaN	NaN	NaN	NaN	NaN	NaN	NaN	NaN	NaN	NaN	NaN	NaN	NaN	NaN
NaN	-179.5	-178.5	-177.5	-176.5	-175.5	-174.5	-173.5	-172.5	-171.5	-170.5	-169.5	-168.5	-167.5	-166.5	-165.5	-164.5	-163.5	-162.5	-161.5	-160.5	-159.5	-158.5	-157.5	-156.5	-155.5	-154.5	-153.5	-152.5	-151.5	-150.5	-149.5	-148.5	-147.5	-146.5	-145.5	-144.5	-143.5	-142.5	-141.5	-140.5	-139.5	-138.5	-137.5	-136.5	-135.5	-134.5	-133.5	-132.5	-131.5
[truncated: 311 more columns]
